# Supplementary material
Source: publisher figshare collection journal article supplement (https://tandf.figshare.com/articles/dataset/_/825897)
Supplement: Supplementary file 1 [file 2]

# Supplementary Materials

## Structural and Energetic Properties of the Potential HIV-1 Reverse Transcriptase Inhibitors d4A and d4G: a Comprehensive Theoretical Investigation

Alla G. Ponomareva, Yevgen P. Yurenko, Roman O. Zhurakivsky, Tanja van Mourik and Dmytro M. Hovorun

### Methodological details

#### Natural bond Order (NBO) Results

**Tables SI and SII:** Characteristics of the specific intramolecular contacts in the d4A and d4G conformers, respectively.

**Figure S1:** Correlation between the energy  $E_{HB}$  of the specific intramolecular interactions and the compliance constant values  $C_{ij}$ .

**Table SIII and SIV:** NBO analysis of donor-acceptor interactions in d4A and d4G, respectively.

**Tables SV and SVI:** QTAIM atomic characteristics of the hydrogen atoms involved in  $C8H \cdots 1H/2C5'$  non-covalent interactions in d4A and d4G, respectively.

**Tables SVII and SVIII:** Cartesian coordinates of the 21 d4A and 20 d4G conformers located in this work, respectively.

## Methodological details

### Conformational analysis

To obtain full conformational families for d4A and d4G, initial structures were generated and optimized by combining three possible values (gauche<sup>+</sup>, gauche<sup>-</sup> and trans) for each of the  $\beta$  and  $\gamma$  torsion angles and four values for the  $\chi$  angle (syn, anti, high-syn, high-anti). The detailed procedure is as follows:

(a) First, d4A and d4G structures corresponding to X-ray crystallographic data (Hutcheon & James 1974; van Roey & Chu 1992) were created and optimized with Gaussian at the B3LYP/6-31G(d,p) level of theory.

(b) The optimized structures were multiplied by changing a single torsion angle –  $\beta$  and  $\gamma$  in 120° steps and  $\chi$  between syn, anti, high-syn and high-anti regions. The resulting structures were subsequently optimized by the same method.

(c) The newly-obtained equilibrium structures were checked for uniqueness; any new conformers were subjected to the procedure described in step (b).

Steps (b) and (c) were repeated continuously until no new conformers were obtained. After this, the conformational family of molecule was assumed to be complete. This procedure is implemented in an in-house software program.

To confirm the stationary points as local minima on the d4A and d4G energy landscapes and to calculate Gibbs free energies, harmonic vibrational frequencies were computed at the same level of theory (using Gaussian's OPT and FREQ keywords). The absence of imaginary frequencies confirmed the optimized conformations to be true minima on the potential energy surface. Relative Gibbs free energies ( $\Delta G$ ) were obtained as sums of the MP2/6-311++G(d,p) electronic energies and the zero-point energies, thermal corrections, and entropy contributions calculated at the B3LYP/6-31G(d,p) level of theory.

### Identification and characterization of non-covalent intramolecular interactions

Specific closed-shell intramolecular interactions were identified using analysis based on Bader's quantum theory of atoms in molecules (QTAIM) (Bader 1990), implemented in the AIMAll program package (Keith 2011). The QTAIM analysis employed the equilibrium geometry wavefunctions calculated at the B3LYP/6-31G(d,p) level. The presence of a bond critical point (BCP, the so-called (3,-1) type) as well as a positive value of the Laplacian of the density at the BCP, were considered as indicators of a closed-shell interaction (Matta, Castillo & Boyd 2006). Moreover, potential H-bond contacts were verified by additional geometric and QTAIM criteria (Koch & Popelier 1995). The energies of the closed-shell interactions were subsequently evaluated by two methods: the Espinosa-Molins-Lecomte (EML) method (Espinosa, Molins & Lecomte 1998) and the compliance constants formalism (Grunenberg 2004; Brandhorst & Grunenberg 2008; Brandhorst & Grunenberg 2010). The EML method is based on the electron density distribution at the BCP:

$$E_{HB} = 0.5 V(r), \quad [1]$$

where  $V(r)$  is the value of the local potential energy at the critical point. Compliance constants measure the displacement of an internal coordinate resulting from a unit force acting on it. The

physical meaning of compliance constants comes from their definition as partial second derivatives of the potential energy due to an external force:

$$C_{ij} = \partial^2 E / \partial f_i \partial f_j . \quad [2]$$

The H...B distances (where B is the H-bond acceptor) were used as internal coordinates for the calculation of the  $C_{ij}$  constants. For the hydrogen-hydrogen bonds, the distance between the two hydrogen atoms, H...H, were used as the internal coordinates. In contrast to force constants, the numerical values of compliance constants do not depend on the coordinate system. As follows from equation [2], a lower numerical value of compliance constant implies a stronger bond. The compliance constants were calculated using the Compliance 3.0.2 program (Brandhorst & Grunenberg 2008; Brandhorst & Grunenberg 2010). The energies of the OH...N and NH...O H-bonds were also evaluated by Iogansen's empirical formula (Iogansen 1981) (which can only be applied to conventional H-bonds):

$$E_{HB} = 0.33 (\Delta\nu - 40)^{1/2} , \quad [3]$$

where  $E_{HB}$  is the H-bond energy change in kcal/mol and  $\Delta\nu$  is the frequency red shift of the  $\nu(\text{OH})$  stretching mode (in  $\text{cm}^{-1}$ ). Structurally close conformers without H-bonds (d4A: conformer 21; d4G: conformers 11 and 20) were taken as reference molecules.

The electronic nature of the specific intramolecular interactions (including H-bonds) was analyzed with Natural Bond Orbital (NBO) analysis, which interprets the electronic wavefunction in terms of occupied Lewis and unoccupied non-Lewis localized orbitals (Weinhold & Landis 2005). A second-order Fock matrix analysis was carried out to evaluate the interaction between donor (i) and acceptor (j) bonds. Such a donor-acceptor interaction results in a migration of the electron density from the idealized Lewis structure into an empty non-Lewis orbital  $\sigma^*$ . The stabilization energy of a donor-acceptor pair is:

$$E^{(2)} = \Delta E_{ij} = q_i \frac{F(i,j)^2}{\varepsilon_j - \varepsilon_i} , \quad [4]$$

where  $q_i$  is the occupancy of the donor orbital,  $\varepsilon_j$  and  $\varepsilon_i$  are diagonal elements and  $F(i,j)$  is the off-diagonal element of the NBO Fock matrix.

## Natural Bond Order (NBO) results

The NBO results of the specific intramolecular interactions in d4A and d4G are listed in Tables SIII and SIV, respectively. For the NH...O, OH...N and CH...O H-bonds hyperconjugative interactions between the oxygen lone pair and the antibonding orbital of the donor group ( $\text{BD}^*(\text{XH})$ ; where  $\text{X}=\text{O}, \text{N}$  or  $\text{C}$ ), were observed (denoted  $\text{LP}(\text{O})\text{-BD}^*(\text{XH})$  in Tables SIII and SIV). Similar hyperconjugative interactions were observed for the OH...N and CH...O H-bonds in d4T, d4U and d4C (Ponomareva, Yurenko, Zhurakivsky, van Mourik & Hovorun 2012; Ponomareva, Yurenko, Zhurakivsky, van Mourik & Hovorun 2013). The strengths of these interactions are described by the stabilization energy  $E(2)$  (Eq. [4]), which ranges from 0.06 to 20.8 kcal/mol for d4A and from 0.05 to 29.2 kcal/mol for d4G. NBO analysis shows completely different donor-acceptor interactions for the  $\text{C8H}\cdots\text{H2C5'}/\text{H1C5'}$  dihydrogen contacts: the electron density migrates from the antibonding

orbital BD(1)\*C5'H2 or BD(1)\*C5'H1 to the bonding orbital BD(1)C8H. Similar donor-acceptor interactions between antibonding and bonding orbitals are observed for the O5'H...C8 contacts.

## References

- Bader, R. F. W. (1990). *Atoms in Molecules: A quantum theory*. Oxford, Clarendon.
- Brandhorst, K. & Grunenberg, J. (2008). How strong is it? The interpretation of force and compliance constants as bond strength descriptors. *Chem. Soc. Rev.* 37: 1558-1567.
- Brandhorst, K. & Grunenberg, J. (2010). Efficient computation of compliance matrices in redundant internal coordinates from Cartesian Hessians for nonstationary points. *J. Chem. Phys.* 132: 184101-184107.
- Espinosa, E., Molins, E. & Lecomte, C. (1998). Hydrogen bond strengths revealed by topological analyses of experimentally observed electron densities. *Chem. Phys. Lett.* 285: 170-173.
- Grunenberg, J. (2004). Direct assessment of interresidue forces in Watson-Crick base pairs using theoretical compliance constants. *J. Am. Chem. Soc.* 126: 16310-16311.
- Hutcheon, W. L. & James, M. N. G. (1974). Molecular geometry of 2',3'-dideoxy-2'3'-didehydroadenosine from an X-ray crystal-structure determination. *Acta Cryst. B* 30: 1777-1782.
- Iogansen, A. V. (1981). The hydrogen bond (Russian). Moscow (Russia): 112.
- Keith, T. A. (2011). AIMA11, TK Gristmill Software, Overland Park KS, USA (aim.tkgistmill.com).
- Koch, U. & Popelier, P. L. A. (1995). Characterization of C-H-O hydrogen-bonds on the basis of the charge density. *J. Phys. Chem.* 99: 9747-9754.
- Matta, C. F., Castillo, N. & Boyd, R. J. (2006). Extended weak bonding interactions in DNA:  $\pi$ -stacking (base-base), base-backbone, and backbone-backbone interactions. *J. Phys. Chem. B* 110: 563-578.
- Ponomareva, A. G., Yurenko, Y. P., Zhurakivsky, R. O., van Mourik, T. & Hovorun, D. M. (2012). Complete conformational space of the potential HIV-1 reverse transcriptase inhibitors d4U and d4C. A quantum chemical study. *Phys. Chem. Chem. Phys.* 14: 6787-6795.
- Ponomareva, A. G., Yurenko, Y. P., Zhurakivsky, R. O., van Mourik, T. & Hovorun, D. M. (2013). Conformational landscape of the nucleoside reverse transcriptase inhibitor d4T: A comprehensive quantum-chemical approach. *Curr. Phys. Chem.* 3: 83-92.
- van Roey, P. & Chu, C. K. (1992). The crystal and molecular-structure of the complex of 2',3'-didehydro-2',3'-dideoxyguanosine with pyridine. *Nucleosides & Nucleotides* 11: 1229-1239.
- Weinhold, F. & Landis, C. (2005). *Valency and bonding. A Natural Bond Order donor-acceptor perspective*. Cambridge, Cambridge University Press.

**Table SI.** Geometric, energetic and electron-topological characteristics of the specific intramolecular contacts in the d4A conformers

| conf.     | $\chi/\beta/\gamma$                    | H-bond                                      | d(A...B) <sup>a</sup> | d(H...B) <sup>b</sup> | $\angle AHB^c$ | $\rho^d$ | $\nabla^2 \rho^e$ | 100· $\epsilon^f$ | d(BCP-RCP) <sup>g</sup> | E <sub>HB</sub> <sup>h</sup> | C <sub>ij</sub> <sup>i</sup> |
|-----------|----------------------------------------|---------------------------------------------|-----------------------|-----------------------|----------------|----------|-------------------|-------------------|-------------------------|------------------------------|------------------------------|
| <b>1</b>  | syn/g <sup>+</sup> /g <sup>+</sup>     | O5'H...N3                                   | 2.848                 | 1.867                 | 174.9          | 0.036    | 0.087             | 4                 | 1.149                   | 7.38                         | 4.211                        |
| <b>2</b>  | anti/g <sup>+</sup> /g <sup>+</sup>    | C8H...O5'                                   | 3.294                 | 2.586                 | 122.3          | 0.008    | 0.031             | 83                | 0.986                   | 1.60                         | 19.582                       |
| <b>3</b>  | syn/g <sup>-</sup> /t                  | C5'H1...N3                                  | 3.571                 | 2.614                 | 145.1          | 0.009    | 0.025             | 1                 | 0.973                   | 1.58                         | 21.479                       |
| <b>4</b>  | anti/g <sup>-</sup> /t                 | C8H...H1C5'                                 | 3.341                 | 2.641                 | 121.9          | 0.003    | 0.010             | 8                 | 0.567                   | 0.37                         | 52.226                       |
| <b>5</b>  | anti/t/g <sup>+</sup>                  | C8H...O5'                                   | 3.305                 | 2.326                 | 149.7          | 0.013    | 0.039             | 5                 | 0.988                   | 3.05                         | 13.071                       |
| <b>6</b>  | anti/g <sup>+</sup> /g <sup>+</sup>    | O5'H...C8                                   | 3.790                 | 2.849                 | 164.6          | 0.004    | 0.016             | 89                | 0.256                   | 0.63                         | 39.617                       |
|           |                                        | C2'H...N3                                   | 3.141                 | 2.613                 | 109.3          | 0.010    | 0.033             | 36                | 0.604                   | 1.71                         | 12.062                       |
| <b>7</b>  | anti/t/g <sup>-</sup>                  | C8H...H2C5'                                 | 3.413                 | 2.711                 | 122.3          | 0.003    | 0.009             | 12                | 0.494                   | 0.32                         | 40.394                       |
| <b>8</b>  | syn/t/g <sup>-</sup>                   | C5'H2...N3                                  | 3.541                 | 2.586                 | 145.0          | 0.010    | 0.027             | 2                 | 0.990                   | 1.69                         | 19.740                       |
| <b>9</b>  | anti/g <sup>-</sup> /g <sup>+</sup>    | C8H...O5'                                   | 3.306                 | 2.301                 | 153.7          | 0.014    | 0.040             | 5                 | 0.943                   | 3.27                         | 10.992                       |
| <b>10</b> | anti/g <sup>-</sup> /g <sup>-</sup>    | C8H...H2C5'                                 | 3.463                 | 2.744                 | 123.8          | 0.002    | 0.008             | 21                | 0.422                   | 0.29                         | 55.736                       |
| <b>11</b> | anti/t/g <sup>-</sup>                  | C2'H...N3                                   | 3.218                 | 2.723                 | 107.5          | 0.008    | 0.027             | 58                | 0.457                   | 1.37                         | 23.869                       |
| <b>12</b> | syn/g <sup>-</sup> /g <sup>-</sup>     | C5'H2...N3                                  | 3.522                 | 2.586                 | 143.2          | 0.009    | 0.027             | 1                 | 0.979                   | 1.67                         | 20.096                       |
| <b>13</b> | syn/g <sup>+</sup> (90)/g <sup>-</sup> | C5'H2...N3                                  | 3.531                 | 2.560                 | 147.2          | 0.010    | 0.028             | 3                 | 1.007                   | 1.79                         | 18.636                       |
| <b>14</b> | anti/t/t                               | C2'H...N3                                   | 3.269                 | 2.818                 | 105.0          | 0.007    | 0.024             | 131               | 0.279                   | 1.17                         | 21.464                       |
| <b>15</b> | anti/g <sup>-</sup> /g <sup>-</sup>    | C2'H...N3                                   | 3.229                 | 2.737                 | 107.4          | 0.008    | 0.027             | 62                | 0.432                   | 1.33                         | 29.722                       |
| <b>16</b> | anti/t/t                               | C8H...H1C5'                                 | 3.350                 | 2.674                 | 120.1          | 0.003    | 0.009             | 11                | 0.496                   | 0.35                         | 59.655                       |
| <b>17</b> | anti/g <sup>+</sup> /g <sup>-</sup>    | C8H...H2C5'                                 | 3.408                 | 2.699                 | 122.7          | 0.003    | 0.009             | 10                | 0.506                   | 0.33                         | 51.726                       |
| <b>18</b> | anti/g <sup>+</sup> /t                 | no closed-shell intramolecular interactions |                       |                       |                |          |                   |                   |                         |                              |                              |
| <b>19</b> | anti/g <sup>+</sup> /g <sup>-</sup>    | C2'H...N3                                   | 3.188                 | 2.689                 | 107.6          | 0.008    | 0.029             | 50                | 0.507                   | 1.47                         | 23.467                       |
| <b>20</b> | anti/g <sup>+</sup> /t                 | C8H...H1C5'                                 | 3.490                 | 2.743                 | 126.0          | 0.002    | 0.008             | 29                | 0.397                   | 0.28                         | 59.654                       |

<sup>a</sup> Distance between the donor (A) and acceptor (B) atoms, Å; <sup>b</sup> Distance between the hydrogen (H) and B atoms, Å (for putative H-bonds); <sup>c</sup> H-bond angle (for putative H-bonds), degree; <sup>d</sup> Electron density value at the BCP, a.u.; <sup>e</sup> Laplacian of the electron density value at the BCP, a.u.; <sup>f</sup> Ellipticity at the BCP; <sup>g</sup> Distance from the BCP to the nearest ring critical point (RCP, the so-called (3,+1) point). <sup>h</sup> Interaction energy, calculated by Eq. [1], kcal/mol. <sup>i</sup> Compliance constant, Å/mDyn.

**Table SII.** Geometric, energetic and electron-topological characteristics of the specific intramolecular contacts in the d4G conformers

| conf.     | $\chi/\beta/\gamma$                 | H-bond                                      | d(A...B) <sup>a</sup> | d(H...B) <sup>b</sup> | $\angle AHB^c$ | $\rho^d$ | $\nabla^2 \rho^e$ | 100· $\epsilon^f$ | d(BCP-RCP) <sup>g</sup> | E <sub>HB</sub> <sup>h</sup> | C <sub>ij</sub> <sup>i</sup> |
|-----------|-------------------------------------|---------------------------------------------|-----------------------|-----------------------|----------------|----------|-------------------|-------------------|-------------------------|------------------------------|------------------------------|
| <b>1</b>  | syn/g <sup>+</sup> /g <sup>+</sup>  | N2H1...O5'                                  | 3.234                 | 2.398                 | 139.1          | 0.010    | 0.036             | 57                | 0.490                   | 2.21                         | 10.743                       |
|           |                                     | O5'H...N3                                   | 2.738                 | 1.766                 | 167.5          | 0.045    | 0.109             | 5                 | 1.064                   | 10.11                        | 3.047                        |
| <b>2</b>  | anti/g <sup>+</sup> /g <sup>+</sup> | C8H...O5'                                   | 3.319                 | 2.634                 | 120.7          | 0.008    | 0.030             | 132               | 0.964                   | 1.42                         | 20.806                       |
| <b>3</b>  | anti/g <sup>-</sup> /t              | C8H...H1C5'                                 | 3.327                 | 2.672                 | 118.6          | 0.003    | 0.010             | 7                 | 0.530                   | 0.36                         | 47.055                       |
| <b>4</b>  | anti/t/g <sup>+</sup>               | C8H...O5'                                   | 3.295                 | 2.345                 | 145.7          | 0.013    | 0.038             | 7                 | 1.045                   | 2.93                         | 12.750                       |
| <b>5</b>  | anti/t/g <sup>-</sup>               | C8H...H2C5'                                 | 3.335                 | 2.713                 | 116.2          | 0.003    | 0.009             | 5                 | 0.494                   | 0.34                         | 31.394                       |
| <b>6</b>  | syn/g <sup>-</sup> /t               | C5'H1...N3                                  | 3.614                 | 2.673                 | 143.3          | 0.008    | 0.024             | 1                 | 0.947                   | 1.41                         | 23.013                       |
| <b>7</b>  | anti/g <sup>+</sup> /g <sup>+</sup> | O5'H...C8                                   | 3.657                 | 2.727                 | 161.4          | 0.006    | 0.019             | 26                | 0.536                   | 0.81                         | 31.130                       |
|           |                                     | C2'H...N3                                   | 3.161                 | 2.660                 | 107.6          | 0.009    | 0.031             | 43                | 0.548                   | 1.56                         | 15.750                       |
| <b>8</b>  | anti/g <sup>-</sup> /g <sup>-</sup> | C8H...H2C5'                                 | 3.448                 | 2.786                 | 119.4          | 0.002    | 0.008             | 24                | 0.360                   | 0.28                         | 30.211                       |
| <b>9</b>  | syn/t/g <sup>-</sup>                | C5'H2...N3                                  | 3.684                 | 2.751                 | 142.5          | 0.007    | 0.020             | 3                 | 0.898                   | 1.16                         | 31.485                       |
| <b>10</b> | anti/t/t                            | C8H...H1C5'                                 | 3.286                 | 2.696                 | 113.9          | 0.003    | 0.010             | 10                | 0.499                   | 0.36                         | 59.723                       |
| <b>11</b> | syn/g <sup>-</sup> /g <sup>-</sup>  | C5'H2...N3                                  | 3.548                 | 2.606                 | 144.0          | 0.009    | 0.026             | 1                 | 0.956                   | 1.62                         | 21.880                       |
| <b>12</b> | anti/g <sup>+</sup> /g <sup>-</sup> | C8H...H2C5'                                 | 3.369                 | 2.747                 | 116.4          | 0.003    | 0.008             | 5                 | 0.481                   | 0.32                         | 64.317                       |
| <b>13</b> | anti/g <sup>-</sup> /g <sup>+</sup> | C8H...O5'                                   | 3.318                 | 2.312                 | 154.0          | 0.014    | 0.039             | 5                 | 0.951                   | 3.19                         | 10.818                       |
| <b>14</b> | syn/g <sup>-</sup> /t               | O5'H...N3                                   | 2.826                 | 2.000                 | 140.8          | 0.028    | 0.074             | 8                 | 0.872                   | 6.31                         | 9.620                        |
|           |                                     | N2H1...O5'                                  | 3.284                 | 2.414                 | 143.2          | 0.010    | 0.034             | 30                | 0.574                   | 2.31                         | 10.598                       |
| <b>15</b> | anti/t/t                            | C8H...H1C5'                                 | 3.055                 | 2.611                 | 103.8          | 0.004    | 0.016             | 41                | 0.223                   | 0.58                         | 34.348                       |
|           |                                     | C2'H...N3                                   | 3.281                 | 2.854                 | 103.5          | 0.006    | 0.024             | 464               | 0.100                   | 1.14                         | 19.707                       |
| <b>16</b> | anti/g <sup>+</sup> /g <sup>-</sup> | no closed-shell intramolecular interactions |                       |                       |                |          |                   |                   |                         |                              |                              |
| <b>17</b> | syn/g <sup>+</sup> /g <sup>-</sup>  | C5'H2...N3                                  | 3.608                 | 2.658                 | 144.5          | 0.008    | 0.024             | 2                 | 0.967                   | 1.45                         | 25.643                       |
| <b>18</b> | anti/g <sup>+</sup> /t              | C8H...H1C5'                                 | 3.605                 | 2.747                 | 144.5          | 0.002    | 0.008             | 17                | 0.423                   | 0.29                         | 60.997                       |
| <b>19</b> | anti/g <sup>+</sup> /t              | C8H...H1C5'                                 | 3.130                 | 2.635                 | 107.3          | 0.004    | 0.015             | 441               | 0.045                   | 0.55                         | 35.720                       |
|           |                                     | C8H...O5'                                   | 3.856                 | 2.911                 | 146.3          | 0.004    | 0.016             | 183               | 0.109                   | 0.66                         | 75.497                       |
| <b>20</b> | syn/g <sup>+</sup> /t               | C5'H1...N3                                  | 3.580                 | 2.628                 | 145.2          | 0.009    | 0.025             | 2                 | 0.958                   | 1.52                         | 22.077                       |
| <b>21</b> | syn/g <sup>+</sup> /g <sup>+</sup>  | N2H1...O5'                                  | 3.234                 | 2.398                 | 139.1          | 0.010    | 0.036             | 57                | 0.490                   | 2.21                         | 10.743                       |

<sup>a</sup> See footnote, Table SI.

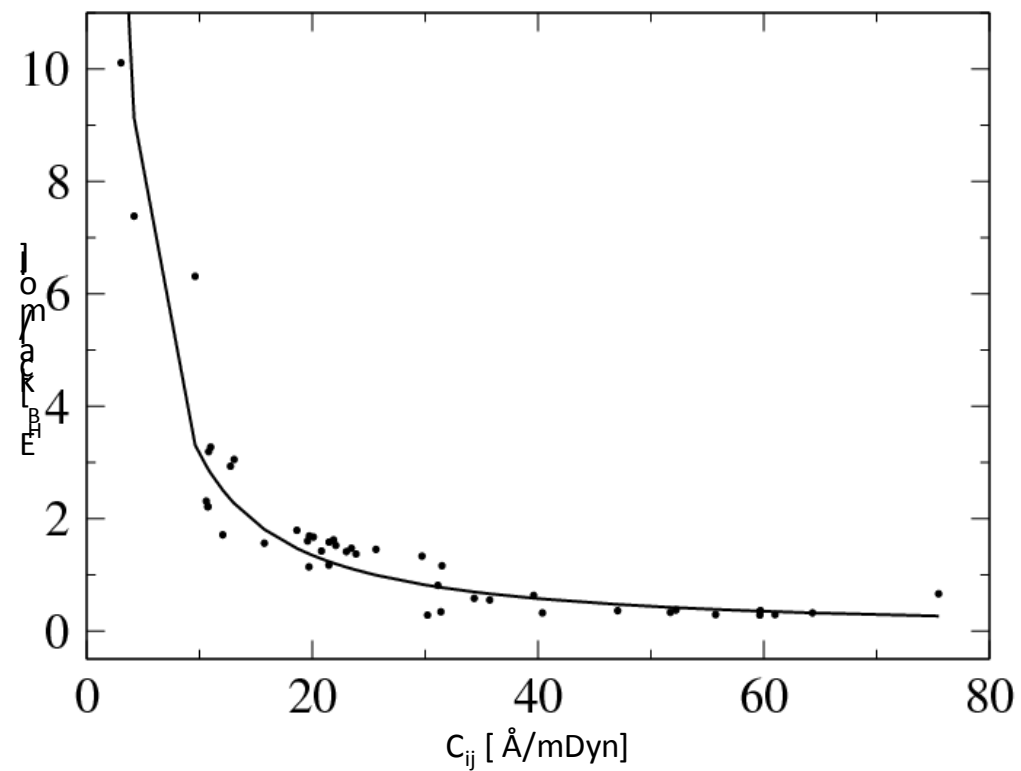

**Figure S1:** Correlation between the energy  $E_{HB}$  (in kcal/mol) of the specific intramolecular interactions, calculated using formula (2) and the compliance constant values  $C_{ij}$  (in Å/mDyn).

**Table SIII.** NBO analysis of donor-acceptor interactions in d4A through specific intramolecular contacts<sup>a</sup>

| conf.     | $\chi/\gamma/\beta$                            | H-interaction                | acceptor-donor NBOs                            | E(2)  | Occupancy of donor NBO | Energy of donor NBO | Occupancy of acceptor NBO | Energy of acceptor NBO |
|-----------|------------------------------------------------|------------------------------|------------------------------------------------|-------|------------------------|---------------------|---------------------------|------------------------|
| <b>1</b>  | syn/g <sup>+</sup> /g <sup>+</sup>             | O5'H...N3                    | LP(1) <sub>N3</sub> – BD(1)* <sub>O5'H</sub>   | 20.81 | 1.88176                | -0.36057            | 0.05311                   | 0.49916                |
| <b>2</b>  | anti/g <sup>+</sup> /g <sup>+</sup>            | C8H...O5'                    | LP(2) <sub>O5'</sub> – BD(1)* <sub>C8H</sub>   | 0.57  | 1.95036                | -0.29583            | 0.02213                   | 0.48064                |
| <b>3</b>  | syn/g <sup>-</sup> /t                          | C5'H1...N3                   | LP(1) <sub>N3</sub> – BD(1)* <sub>C5'H1</sub>  | 1.48  | 1.91046                | -0.34887            | 0.02994                   | 0.47730                |
| <b>4</b>  | anti/g <sup>-</sup> /t                         | C8H...H1C5'                  | BD(1) <sub>C8H</sub> – BD(1)* <sub>C5'H1</sub> | 0.09  | 1.98458                | -0.56764            | 0.03090                   | 0.43261                |
| <b>5</b>  | anti/t/g <sup>+</sup>                          | C8H...O5'                    | LP(1) <sub>O5'</sub> – BD(1)* <sub>C8H</sub>   | 1.30  | 1.97820                | -0.58952            | 0.02611                   | 0.50592                |
|           |                                                |                              | LP(2) <sub>O5'</sub> – BD(1)* <sub>C8H</sub>   | 2.38  | 1.95606                | -0.32759            |                           |                        |
| <b>6</b>  | anti/g <sup>+</sup> /g <sup>+</sup>            | O5'H...C8                    | BD(1) <sub>C8H</sub> – BD(1)* <sub>O5'H</sub>  | 0.09  | 1.98470                | -0.56407            | 0.01311                   | 0.46703                |
|           |                                                | C2'H...N3                    | LP(1) <sub>N3</sub> – BD(1)* <sub>C2'H</sub>   | 0.83  | 1.91263                | -0.35151            | 0.01549                   | 0.49309                |
| <b>7</b>  | anti/t/g <sup>-</sup>                          | C8H...H2C5'                  | BD(1) <sub>C8H</sub> – BD(1)* <sub>C5'H2</sub> | 0.07  | 1.98462                | -0.56293            | 0.02822                   | 0.43515                |
| <b>8</b>  | syn/t/g <sup>-</sup>                           | C5'H2...N3                   | LP(1) <sub>N3</sub> – BD(1)* <sub>C5'H2</sub>  | 1.69  | 1.91012                | -0.34635            | 0.02687                   | 0.47911                |
| <b>9</b>  | anti/g <sup>-</sup> /g <sup>+</sup>            | C8H...O5'                    | LP(1) <sub>O5'</sub> – BD(1)* <sub>C8H</sub>   | 1.27  | 1.97779                | -0.60287            | 0.02760                   | 0.50539                |
|           |                                                |                              | LP(2) <sub>O5'</sub> – BD(1)* <sub>C8H</sub>   | 2.76  | 1.94927                | -0.30889            |                           |                        |
| <b>10</b> | anti/g <sup>-</sup> /g <sup>-</sup>            | C8H...H2C5'                  | BD(1) <sub>C8H</sub> – BD(1)* <sub>C5'H2</sub> | 0.06  | 1.98462                | -0.56322            | 0.01932                   | 0.45150                |
| <b>11</b> | anti/t/g <sup>-</sup>                          | C2'H...N3                    | LP(1) <sub>N3</sub> – BD(1)* <sub>C2'H</sub>   | 0.48  | 1.91337                | -0.34794            | 0.01495                   | 0.49348                |
| <b>12</b> | syn/g <sup>-</sup> /g <sup>-</sup>             | C5'H2...N3                   | LP(1) <sub>N3</sub> – BD(1)* <sub>C5'H2</sub>  | 1.68  | 1.91016                | -0.34492            | 0.02159                   | 0.49450                |
| <b>13</b> | syn/g <sup>+</sup> g <sup>-</sup> <sup>b</sup> | C5'H2...N3                   | LP(1) <sub>N3</sub> – BD(1)* <sub>C5'H2</sub>  | 1.69  | 1.91049                | -0.34977            | 0.02460                   | 0.47956                |
| <b>14</b> | anti/t/t                                       | C2'H...N3                    | LP(1) <sub>N3</sub> – BD(1)* <sub>C2'H</sub>   | 0.31  | 1.91371                | -0.34748            | 0.01432                   | 0.48832                |
| <b>15</b> | anti/g <sup>-</sup> /g <sup>-</sup>            | C2'H...N3                    | LP(1) <sub>N3</sub> – BD(1)* <sub>C2'H</sub>   | 0.45  | 1.91344                | -0.34835            | 0.01481                   | 0.49165                |
| <b>16</b> | anti/t/t                                       | C8H...H1C5'                  | BD(1) <sub>C8H</sub> – BD(1)* <sub>C5'H1</sub> | 0.08  | 1.98467                | -0.56354            | 0.02613                   | 0.43449                |
| <b>17</b> | anti/g <sup>+</sup> /g <sup>-</sup>            | C8H...H2C5'                  | BD(1) <sub>C8H</sub> – BD(1)* <sub>C5'H2</sub> | 0.07  | 1.98468                | -0.56624            | 0.02474                   | 0.43402                |
| <b>18</b> | anti/g <sup>+</sup> /t                         | no closed-shell interactions |                                                |       |                        |                     |                           |                        |
| <b>19</b> | anti/g <sup>+</sup> /g <sup>-</sup>            | C2'H...N3                    | LP(1) <sub>N3</sub> – BD(1)* <sub>C2'H</sub>   | 0.58  | 1.91326                | -0.35068            | 0.01507                   | 0.48834                |
| <b>20</b> | anti/g <sup>+</sup> /t                         | C8H...H1C5'                  | BD(1) <sub>C8H</sub> – BD(1)* <sub>C5'H1</sub> | 0.06  | 1.98469                | -0.56275            | 0.01958                   | 0.45162                |

<sup>a</sup> LP: orbital that corresponds to the electron lone pair; BD: bonding orbital; BD<sup>\*</sup>: antibonding orbital; E<sup>(2)</sup>: stabilization energy, defined by formula (3), in kcal/mol. <sup>b</sup> The  $\gamma$  angle is 90°.



**Table SIV.** NBO analysis of donor-acceptor interactions in d4G through specific intramolecular contacts<sup>a</sup>

| conf.     | $\chi/\gamma/\beta$                 | H-interaction                | acceptor-donor NBOs                               | E(2)  | Occupancy<br>of donor<br>NBO | Energy of<br>donor<br>NBO | Occupancy<br>of acceptor<br>NBO | Energy of<br>acceptor<br>NBO |
|-----------|-------------------------------------|------------------------------|---------------------------------------------------|-------|------------------------------|---------------------------|---------------------------------|------------------------------|
| <b>1</b>  | syn/g <sup>+</sup> /g <sup>+</sup>  | N2H1...O5'                   | LP(1) <sub>O5'</sub> – BD*(1) <sub>N2-H1</sub>    | 0.51  | 1.97267                      | -0.54052                  | 0.01348                         | 0.46190                      |
|           |                                     |                              | LP(2) <sub>O5'</sub> – BD*(1) <sub>N2-H1</sub>    | 1.21  | 1.94486                      | -0.28179                  | 0.01348                         | 0.46190                      |
| <b>2</b>  | anti/g <sup>+</sup> /g <sup>+</sup> | O5'H...N3                    | LP(1) <sub>N3</sub> – BD*(1) <sub>O5'-H'</sub>    | 29.18 | 1.85352                      | -0.36455                  | 0.06971                         | 0.47136                      |
|           |                                     | C8H...O5'                    | LP(1) <sub>O5'</sub> – BD*(1) <sub>C8-H</sub>     | 0.21  | 1.98029                      | -0.59347                  | 0.02203                         | 0.48739                      |
|           |                                     |                              | LP(2) <sub>O5'</sub> – BD*(1) <sub>C8-H</sub>     | 0.46  | 1.95017                      | -0.29287                  | 0.02203                         | 0.48739                      |
| <b>3</b>  | anti/g <sup>-</sup> /t              | C8H...H1C5'                  | BD(1) <sub>C5'-H1'</sub> – BD*(1) <sub>C8-H</sub> | 0.08  | 1.98756                      | -0.51302                  | 0.02110                         | 0.47605                      |
|           |                                     |                              | BD(1) <sub>C8-H</sub> – BD*(1) <sub>C5'-H1'</sub> | 0.08  | 1.98448                      | -0.55910                  | 0.03025                         | 0.43701                      |
| <b>4</b>  | anti/t/g <sup>+</sup>               | C8H...O5'                    | LP(1) <sub>O5'</sub> – BD*(1) <sub>C8-H</sub>     | 1.17  | 1.97894                      | -0.58642                  | 0.02566                         | 0.51193                      |
|           |                                     |                              | LP(2) <sub>O5'</sub> – BD*(1) <sub>C8-H</sub>     | 2.10  | 1.95492                      | -0.32143                  | 0.02566                         | 0.51193                      |
| <b>5</b>  | anti/t/g <sup>-</sup>               | C8H...H2C5'                  | no donor-acceptor interactions                    |       |                              |                           |                                 |                              |
| <b>6</b>  | syn/g <sup>-</sup> /t               | C5'H1...N3                   | LP(1) <sub>N3</sub> – BD*(1) <sub>C5'-H1'</sub>   | 1.22  | 1.89271                      | -0.35908                  | 0.03150                         | 0.45790                      |
| <b>7</b>  | anti/g <sup>+</sup> /g <sup>+</sup> | O5'H...C8                    | BD(2) <sub>C8-N7</sub> – BD*(1) <sub>O5'-H'</sub> | 0.40  | 0.33342                      | 0.01451                   | 0.01302                         | 0.46878                      |
|           |                                     | C2'H...N3                    | LP(1) <sub>N3</sub> – BD*(1) <sub>C2'-H'</sub>    | 0.62  | 1.89612                      | -0.36243                  | 0.01533                         | 0.48400                      |
| <b>8</b>  | anti/g <sup>-</sup> /g <sup>-</sup> | C8H...H2C5'                  | BD(1) <sub>C8-H</sub> – BD*(1) <sub>C5'-H2'</sub> | 0.05  | 1.98449                      | -0.55477                  | 0.01911                         | 0.45555                      |
| <b>9</b>  | syn/t/g <sup>-</sup>                | C5'H2...N3                   | LP(1) <sub>N3</sub> – BD*(1) <sub>C5'-H2'</sub>   | 0.87  | 1.89272                      | -0.35544                  | 0.02901                         | 0.45762                      |
| <b>10</b> | anti/t/t                            | C8H...H1C5'                  | BD(1) <sub>C8-H</sub> – BD*(1) <sub>C5'-H1'</sub> | 0.08  | 1.98455                      | -0.55543                  | 0.02491                         | 0.43933                      |
| <b>11</b> | syn/g <sup>-</sup> /g <sup>-</sup>  | C5'H2...N3                   | LP(1) <sub>N3</sub> – BD*(1) <sub>C5'-H2'</sub>   | 1.45  | 1.89217                      | -0.35485                  | 0.02233                         | 0.47721                      |
| <b>12</b> | anti/g <sup>+</sup> /g <sup>-</sup> | C8H...H2C5'                  | BD(1) <sub>C8-H</sub> – BD*(1) <sub>C5'-H2'</sub> | 0.07  | 1.98454                      | -0.55793                  | 0.02382                         | 0.43861                      |
| <b>13</b> | anti/g <sup>-</sup> /g <sup>+</sup> | C8H...O5'                    | LP(1) <sub>O5'</sub> – BD*(1) <sub>C8-H</sub>     | 1.24  | 1.97782                      | -0.60043                  | 0.02747                         | 0.51340                      |
|           |                                     |                              | LP(2) <sub>O5'</sub> – BD*(1) <sub>C8-H</sub>     | 2.61  | 1.94902                      | -0.30535                  | 0.02747                         | 0.51340                      |
| <b>14</b> | syn/g <sup>-</sup> /t               | O5'H...N3                    | LP(1) <sub>N3</sub> – BD*(1) <sub>O5'-H'</sub>    | 10.79 | 1.87684                      | -0.36219                  | 0.03902                         | 0.46263                      |
|           |                                     | N2H1...O5'                   | LP(1) <sub>O5'</sub> – BD*(1) <sub>N2-H1</sub>    | 0.06  | 1.97936                      | -0.56712                  | 0.01670                         | 0.46120                      |
|           |                                     |                              | LP(2) <sub>O5'</sub> – BD*(1) <sub>N2-H1</sub>    | 2.39  | 1.93701                      | -0.29552                  | 0.01670                         | 0.46120                      |
| <b>15</b> | anti/t/t                            | C8H...H1C5'                  | BD(1) <sub>C8-H</sub> – BD*(1) <sub>C5'-H1'</sub> | 0.06  | 1.98451                      | -0.54501                  | 0.02665                         | 0.43689                      |
|           |                                     | C2'H...N3                    | LP(1) <sub>N3</sub> – BD*(1) <sub>C2'-H'</sub>    | 0.24  | 1.89697                      | -0.35861                  | 0.01440                         | 0.48014                      |
| <b>16</b> | anti/g <sup>+</sup> /g <sup>-</sup> | no closed-shell interactions |                                                   |       |                              |                           |                                 |                              |
| <b>17</b> | syn/g <sup>+</sup> /g <sup>-</sup>  | C5'H2...N3                   | LP(1) <sub>N3</sub> – BD*(1) <sub>C5'-H2'</sub>   | 1.26  | 1.89276                      | -0.35936                  | 0.02684                         | 0.45964                      |

**Table SIV.** Continued

|           |                        |                        |                                                   |      |         |          |         |         |
|-----------|------------------------|------------------------|---------------------------------------------------|------|---------|----------|---------|---------|
| <b>18</b> | anti/g <sup>+</sup> /t | C8H...H1C5'            | BD(1) <sub>C8-H</sub> – BD*(1) <sub>C5'-H1'</sub> | 0.06 | 1.98457 | -0.55459 | 0.01926 | 0.45605 |
| <b>19</b> | anti/g <sup>+</sup> /t | C8H...H1C5'            | BD(1) <sub>C8-H</sub> – BD*(1) <sub>C5'-H1'</sub> | 0.05 | 1.98441 | -0.54204 | 0.01890 | 0.45308 |
|           |                        | C8H...O5' <sup>b</sup> | LP(1) <sub>O5'</sub> – BD*(1) <sub>C8-H</sub>     | 0.13 | 1.97947 | -0.59458 | 0.02076 | 0.50428 |
|           |                        |                        | LP(2) <sub>O5'</sub> – BD*(1) <sub>C8-H</sub>     | 0.14 | 1.95229 | -0.29835 | 0.02076 | 0.50428 |
| <b>20</b> | syn/g <sup>+</sup> /t  | C5'H1...N3             | LP(1) <sub>N3</sub> – BD*(1) <sub>C5'-H1'</sub>   | 1.36 | 1.89267 | -0.35549 | 0.02261 | 0.47609 |

<sup>a</sup> LP: orbital that corresponds to the electron lone pair; BD: bonding orbital; BD\* : antibonding orbital; E<sup>(2)</sup>: stabilization energy, defined by formula (3), in kcal/mol. <sup>b</sup> Bifurcated contacts.

**Table SV.** QTAIM atomic characteristics (charge q, dipolar polarization M, volume V, energy E and radius r) of the hydrogen atoms involved in C8H...1H/2C5' non-covalent interactions in d4A. Wavefunctions were calculated at the B3LYP/6-31G(d,p) level of theory.

| conf.     | $\chi / \beta / \gamma$             | q(C8H) | q(C5'H1/2) | M(C8H) | M(C5'H1/2) | V(C8H) | V(C5'H1/2) | E(C8H) | E(C5'H1/2) | r(C8H) | r(C5'H1/2) |
|-----------|-------------------------------------|--------|------------|--------|------------|--------|------------|--------|------------|--------|------------|
| <b>4</b>  | anti/g <sup>-</sup> /t              | 0.062  | -0.019     | 0.127  | 0.149      | 46.9   | 51.8       | -0.605 | -0.641     | 2.508  | 2.514      |
| <b>7</b>  | anti/t/g <sup>-</sup>               | 0.067  | -0.014     | 0.130  | 0.152      | 46.9   | 51.6       | -0.602 | -0.639     | 2.575  | 2.579      |
| <b>10</b> | anti/g <sup>-</sup> /g <sup>-</sup> | 0.064  | 0.014      | 0.127  | 0.143      | 47.2   | 49.4       | -0.603 | -0.630     | 2.617  | 2.608      |
| <b>16</b> | anti/t/t                            | 0.054  | -0.018     | 0.125  | 0.143      | 47.4   | 51.4       | -0.608 | -0.642     | 2.554  | 2.531      |
| <b>17</b> | anti/g <sup>+</sup> /g <sup>-</sup> | 0.057  | -0.017     | 0.127  | 0.146      | 47.6   | 51.5       | -0.607 | -0.641     | 2.564  | 2.565      |
| <b>20</b> | anti/g <sup>+</sup> /t              | 0.064  | 0.014      | 0.128  | 0.139      | 47.5   | 49.2       | -0.604 | -0.631     | 2.609  | 2.612      |
|           | MIN                                 | 0.054  | -0.019     | 0.125  | 0.139      | 46.9   | 49.2       | -0.608 | -0.642     | 2.508  | 2.514      |
|           | MAX                                 | 0.067  | 0.014      | 0.13   | 0.152      | 47.6   | 51.8       | -0.602 | -0.630     | 2.617  | 2.612      |

<sup>a</sup> MIN and MAX: minimal and maximal values for different parameters. All quantities are in atomic units.

**Table SVI.** QTAIM atomic characteristics (charge q, dipolar polarization M, volume V, energy E and radius r) of the hydrogen atoms involved in C8H...1H/2C5' non-covalent interactions in d4G. Wavefunctions were calculated at the B3LYP/6-31G(d,p) level of theory.

| conf.     | $\chi / \beta / \gamma$             | q(C8H) | q(C5'H1/2) | M(C8H) | M(C5'H1/2) | V(C8H) | V(C5'H1/2) | -E(C8H) | -E(C5'H1/2) | r(C8H) | r(C5'H1/2) |
|-----------|-------------------------------------|--------|------------|--------|------------|--------|------------|---------|-------------|--------|------------|
| <b>3</b>  | (anti/g <sup>-</sup> /t             | 0.057  | -0.018     | 0.126  | 0.147      | 47.1   | 51.4       | -0.607  | -0.641      | 2.561  | 2.528      |
| <b>5</b>  | (anti/t/g <sup>-</sup>              | 0.056  | -0.011     | 0.126  | 0.149      | 47.0   | 51.1       | -0.607  | -0.638      | 2.618  | 2.553      |
| <b>8</b>  | (anti/g-/g-                         | 0.060  | 0.017      | 0.127  | 0.141      | 46.9   | 49.1       | -0.605  | -0.629      | 2.688  | 2.631      |
| <b>10</b> | anti/t/t                            | 0.054  | -0.003     | 0.127  | 0.147      | 47.1   | 50.3       | -0.608  | -0.635      | 2.622  | 2.522      |
| <b>12</b> | anti/g <sup>+</sup> /g <sup>-</sup> | 0.054  | -0.010     | 0.127  | 0.146      | 47.2   | 50.8       | -0.608  | -0.638      | 2.650  | 2.583      |
| <b>15</b> | anti/t/t                            | 0.086  | -0.007     | 0.113  | 0.142      | 42.6   | 49.3       | -0.598  | -0.638      | 2.576  | 2.440      |
| <b>18</b> | anti/g <sup>+</sup> /t              | 0.054  | 0.023      | 0.126  | 0.140      | 47.3   | 48.8       | -0.608  | -0.627      | 2.649  | 2.589      |
| <b>19</b> | anti/g <sup>+</sup> /t              | 0.102  | 0.015      | 0.113  | 0.132      | 41.5   | 47.6       | -0.590  | -0.632      | 2.521  | 2.544      |
|           | MIN                                 | 0.054  | -0.018     | 0.113  | 0.132      | 41.5   | 47.6       | -0.608  | -0.641      | 2.521  | 2.440      |
|           | MAX                                 | 0.102  | 0.023      | 0.127  | 0.149      | 47.3   | 51.4       | -0.59   | -0.627      | 2.688  | 2.631      |

<sup>a</sup> MIN and MAX: minimal and maximal values for different parameters. All quantities are in atomic units.

**Table SVII.** Cartesian coordinates (in Å) of the 21 d4A conformers located in this work (listed in decreasing order of stability)

| d4A 1 | X         | Y         | Z         | d4A 2 | X         | Y         | Z         |
|-------|-----------|-----------|-----------|-------|-----------|-----------|-----------|
| C     | -1.357874 | -1.543755 | -0.029753 | C     | -1.219659 | -1.101088 | 0.278673  |
| C     | -2.021959 | -1.203744 | 1.282321  | C     | -2.124135 | -0.969168 | 1.477032  |
| C     | -3.050889 | -0.393676 | 1.056409  | C     | -3.343219 | -0.614800 | 1.083675  |
| C     | -3.160213 | -0.083366 | -0.410882 | C     | -3.398978 | -0.513982 | -0.415754 |
| O     | -2.015624 | -0.755390 | -0.996630 | O     | -2.047584 | -0.780152 | -0.842200 |
| H     | -1.460301 | -2.614421 | -0.271447 | H     | -0.798244 | -2.104606 | 0.145557  |
| H     | -1.682507 | -1.604095 | 2.229832  | H     | -1.774794 | -1.139809 | 2.488014  |
| H     | -3.724949 | 0.021838  | 1.795356  | H     | -4.203664 | -0.437490 | 1.718623  |
| H     | -4.065993 | -0.530350 | -0.852169 | H     | -4.060854 | -1.291977 | -0.830514 |
| C     | -3.143569 | 1.415207  | -0.742226 | C     | -3.838850 | 0.841119  | -0.985229 |
| H     | -4.164176 | 1.798483  | -0.613807 | H     | -4.821202 | 1.107166  | -0.580316 |
| H     | -2.893991 | 1.512080  | -1.812503 | H     | -3.943087 | 0.746250  | -2.076173 |
| O     | -2.309914 | 2.175569  | 0.090178  | O     | -2.946743 | 1.883964  | -0.641872 |
| H     | -1.406216 | 1.788261  | 0.073912  | H     | -2.100555 | 1.656136  | -1.052952 |
| N     | 2.651771  | 1.818718  | 0.171745  | N     | 3.865452  | -0.671522 | -0.455834 |
| C     | 0.792487  | -0.121038 | 0.038251  | C     | 1.239815  | -0.563983 | 0.027625  |
| C     | 2.139065  | -0.489378 | -0.057269 | C     | 1.978703  | 0.608991  | 0.202896  |
| C     | 3.085933  | 0.553793  | 0.020312  | C     | 3.361641  | 0.511228  | -0.058891 |
| N     | 4.416782  | 0.322286  | -0.037788 | N     | 4.203345  | 1.562177  | 0.096871  |
| H     | 4.751056  | -0.599425 | -0.267004 | H     | 3.819172  | 2.481156  | 0.245395  |
| H     | 5.039675  | 1.112250  | -0.087882 | H     | 5.148130  | 1.465808  | -0.239282 |
| N     | 2.281756  | -1.854063 | -0.231447 | N     | 1.170278  | 1.658294  | 0.608196  |
| N     | 0.090059  | -1.307845 | -0.071956 | N     | -0.061625 | -0.218927 | 0.345969  |
| C     | 1.048676  | -2.293001 | -0.240674 | C     | -0.026575 | 1.128136  | 0.681478  |
| H     | 0.756996  | -3.328005 | -0.364602 | H     | -0.930409 | 1.652486  | 0.960642  |
| C     | 1.331533  | 2.029497  | 0.242171  | C     | 3.026578  | -1.713721 | -0.574425 |
| N     | 0.338375  | 1.134099  | 0.185672  | N     | 1.708469  | -1.758003 | -0.354413 |
| H     | 1.024380  | 3.066341  | 0.356396  | H     | 3.486754  | -2.646134 | -0.894415 |

| d4A 3 | X         | Y         | Z         |
|-------|-----------|-----------|-----------|
| C     | 1.173821  | -1.098715 | -0.278980 |
| C     | 2.032393  | -1.185102 | -1.516026 |
| C     | 3.260927  | -0.749841 | -1.247311 |
| C     | 3.359446  | -0.332743 | 0.192203  |
| O     | 2.040164  | -0.575181 | 0.727571  |
| H     | 0.775018  | -2.064601 | 0.052887  |
| H     | 1.653307  | -1.556864 | -2.460342 |
| H     | 4.093668  | -0.697580 | -1.939398 |
| H     | 4.068469  | -0.958672 | 0.753844  |
| C     | 3.721439  | 1.135639  | 0.432606  |
| H     | 3.045553  | 1.772930  | -0.160709 |
| H     | 4.746244  | 1.326505  | 0.095257  |
| O     | 3.671457  | 1.452320  | 1.807994  |
| H     | 2.788685  | 1.194443  | 2.111943  |
| N     | -3.855462 | -0.561652 | 0.702048  |
| C     | -1.272049 | -0.535662 | 0.023192  |
| C     | -2.039045 | 0.583820  | -0.308636 |
| C     | -3.397708 | 0.533903  | 0.068776  |
| N     | -4.252817 | 1.556992  | -0.168586 |
| H     | -3.958636 | 2.325335  | -0.748720 |
| H     | -5.232076 | 1.414474  | 0.018742  |
| N     | -1.280138 | 1.536355  | -0.969948 |
| N     | -0.003804 | -0.258091 | -0.457492 |
| C     | -0.086327 | 1.000614  | -1.032630 |
| H     | 0.779020  | 1.460791  | -1.488949 |
| C     | -2.993388 | -1.560589 | 0.951625  |
| N     | -1.692537 | -1.639380 | 0.652073  |
| H     | -3.415967 | -2.421392 | 1.465353  |

| d4A 4 | X         | Y         | Z         |
|-------|-----------|-----------|-----------|
| C     | 1.336490  | 1.509889  | 0.174962  |
| C     | 1.847695  | 1.145625  | 1.545914  |
| C     | 2.853917  | 0.284857  | 1.433109  |
| C     | 3.098152  | -0.046459 | -0.010251 |
| O     | 2.125965  | 0.753793  | -0.728856 |
| H     | 1.462254  | 2.581186  | -0.043258 |
| H     | 1.424069  | 1.558238  | 2.453173  |
| H     | 3.422157  | -0.153068 | 2.245462  |
| H     | 4.095507  | 0.269263  | -0.349840 |
| C     | 2.897745  | -1.517946 | -0.381890 |
| H     | 1.911444  | -1.839218 | -0.021699 |
| H     | 3.666807  | -2.126301 | 0.107295  |
| O     | 3.049045  | -1.710400 | -1.778189 |
| H     | 2.379818  | -1.150633 | -2.196957 |
| N     | -2.751493 | -1.736695 | 0.494884  |
| C     | -0.839473 | 0.125714  | 0.224980  |
| C     | -2.131898 | 0.444831  | -0.205882 |
| C     | -3.109904 | -0.560128 | -0.049143 |
| N     | -4.392738 | -0.383869 | -0.443068 |
| H     | -4.698736 | 0.523295  | -0.753894 |
| H     | -5.067458 | -1.096689 | -0.218108 |
| N     | -2.198300 | 1.730394  | -0.715783 |
| N     | -0.091552 | 1.267996  | -0.025386 |
| C     | -0.972971 | 2.172380  | -0.596294 |
| H     | -0.632063 | 3.154401  | -0.898863 |
| C     | -1.469180 | -1.901977 | 0.855250  |
| N     | -0.451348 | -1.040049 | 0.761453  |
| H     | -1.229301 | -2.872774 | 1.283809  |

| d4A 5 | X         | Y         | Z         |
|-------|-----------|-----------|-----------|
| C     | -1.164731 | -1.132296 | 0.055617  |
| C     | -1.998946 | -1.167160 | 1.312299  |
| C     | -3.252340 | -0.827289 | 1.031567  |
| C     | -3.390265 | -0.547772 | -0.441481 |
| O     | -2.066854 | -0.730923 | -0.969755 |
| H     | -0.716271 | -2.102165 | -0.193331 |
| H     | -1.582137 | -1.430324 | 2.276729  |
| H     | -4.078657 | -0.749620 | 1.728174  |
| H     | -4.055783 | -1.282457 | -0.923958 |
| C     | -3.933233 | 0.835295  | -0.793736 |
| H     | -5.019465 | 0.837215  | -0.607353 |
| H     | -3.774547 | 0.994893  | -1.868915 |
| O     | -3.279064 | 1.824232  | -0.010432 |
| H     | -3.432243 | 2.685144  | -0.418480 |
| N     | 3.959915  | -0.625740 | -0.252785 |
| C     | 1.298266  | -0.551344 | -0.024574 |
| C     | 1.993373  | 0.654275  | 0.108451  |
| C     | 3.395145  | 0.571951  | -0.013091 |
| N     | 4.199119  | 1.657481  | 0.128584  |
| H     | 3.778705  | 2.572932  | 0.125569  |
| H     | 5.165839  | 1.560034  | -0.138580 |
| N     | 1.127116  | 1.713137  | 0.329417  |
| N     | -0.032652 | -0.214893 | 0.134801  |
| C     | -0.060913 | 1.155935  | 0.338229  |
| H     | -1.005888 | 1.668345  | 0.457580  |
| C     | 3.157739  | -1.698305 | -0.353409 |
| N     | 1.826251  | -1.761234 | -0.249914 |
| H     | 3.664972  | -2.641457 | -0.545880 |

| d4A 6 | X         | Y         | Z         |
|-------|-----------|-----------|-----------|
| C     | 1.296881  | 0.715430  | -1.006395 |
| C     | 1.685508  | 1.704197  | 0.062487  |
| C     | 2.903271  | 1.408095  | 0.505226  |
| C     | 3.454144  | 0.206875  | -0.210273 |
| O     | 2.385536  | -0.180629 | -1.113113 |
| H     | 1.115587  | 1.189873  | -1.981462 |
| H     | 1.018304  | 2.494750  | 0.377815  |
| H     | 3.453851  | 1.931087  | 1.278318  |
| H     | 4.333643  | 0.464135  | -0.821249 |
| C     | 3.822829  | -0.981690 | 0.681392  |
| H     | 4.696537  | -0.712396 | 1.285252  |
| H     | 4.116954  | -1.820265 | 0.030474  |
| O     | 2.800342  | -1.342900 | 1.584356  |
| H     | 2.004027  | -1.520640 | 1.064325  |
| N     | -3.659269 | 0.874171  | 0.527524  |
| C     | -1.131446 | 0.455012  | -0.245634 |
| C     | -1.979867 | -0.655055 | -0.165487 |
| C     | -3.302342 | -0.393420 | 0.253023  |
| N     | -4.219647 | -1.378357 | 0.401122  |
| H     | -4.004961 | -2.307483 | 0.078081  |
| H     | -5.175392 | -1.117711 | 0.582966  |
| N     | -1.328932 | -1.816054 | -0.536997 |
| N     | 0.082291  | -0.053893 | -0.663617 |
| C     | -0.114834 | -1.414121 | -0.835751 |
| H     | 0.686253  | -2.044367 | -1.192921 |
| C     | -2.733051 | 1.838054  | 0.399833  |
| N     | -1.454888 | 1.729401  | 0.024092  |
| H     | -3.075270 | 2.844123  | 0.633065  |

| d4A 7 | X         | Y         | Z         |
|-------|-----------|-----------|-----------|
| C     | -1.054152 | -1.049344 | 0.333298  |
| C     | -1.967931 | -0.886058 | 1.522428  |
| C     | -3.190512 | -0.561189 | 1.110322  |
| C     | -3.222910 | -0.493855 | -0.390966 |
| O     | -1.873527 | -0.763814 | -0.799213 |
| H     | -0.627684 | -2.054907 | 0.234999  |
| H     | -1.624437 | -1.023035 | 2.540710  |
| H     | -4.063915 | -0.371816 | 1.721615  |
| H     | -3.885335 | -1.269800 | -0.803314 |
| C     | -3.669395 | 0.853317  | -0.962342 |
| H     | -3.530505 | 0.834066  | -2.052862 |
| H     | -3.028556 | 1.649636  | -0.554007 |
| O     | -5.031790 | 1.021660  | -0.596167 |
| H     | -5.350880 | 1.845570  | -0.983811 |
| N     | 4.018459  | -0.612285 | -0.488614 |
| C     | 1.401827  | -0.508422 | 0.043615  |
| C     | 2.132912  | 0.677588  | 0.153895  |
| C     | 3.510992  | 0.581070  | -0.130546 |
| N     | 4.346948  | 1.644886  | -0.033362 |
| H     | 3.954698  | 2.566428  | 0.072238  |
| H     | 5.282040  | 1.542893  | -0.394367 |
| N     | 1.321588  | 1.735978  | 0.530868  |
| N     | 0.104016  | -0.163024 | 0.376141  |
| C     | 0.133657  | 1.194983  | 0.647283  |
| H     | -0.764822 | 1.722682  | 0.935518  |
| C     | 3.187416  | -1.665980 | -0.547267 |
| N     | 1.874779  | -1.712782 | -0.298365 |
| H     | 3.649982  | -2.606562 | -0.838681 |

| d4A 8 | X         | Y         | Z         |
|-------|-----------|-----------|-----------|
| C     | -1.165092 | -1.634555 | 0.155044  |
| C     | -1.799156 | -1.145469 | 1.432781  |
| C     | -2.842520 | -0.375344 | 1.143220  |
| C     | -2.995177 | -0.252671 | -0.345746 |
| O     | -1.927044 | -1.053139 | -0.888037 |
| H     | -1.199039 | -2.730936 | 0.064454  |
| H     | -1.416565 | -1.410755 | 2.410637  |
| H     | -3.498358 | 0.134071  | 1.837573  |
| H     | -3.953306 | -0.670699 | -0.688286 |
| C     | -2.881403 | 1.180694  | -0.867291 |
| H     | -2.826398 | 1.150238  | -1.965863 |
| H     | -1.954248 | 1.620718  | -0.480352 |
| O     | -4.045975 | 1.866751  | -0.413970 |
| H     | -3.915561 | 2.809112  | -0.572867 |
| N     | 2.659714  | 1.937497  | 0.279893  |
| C     | 0.902394  | -0.088146 | 0.150157  |
| C     | 2.246158  | -0.363724 | -0.128723 |
| C     | 3.138606  | 0.726039  | -0.053459 |
| N     | 4.459403  | 0.595058  | -0.325513 |
| H     | 4.849838  | -0.325403 | -0.444330 |
| H     | 5.065499  | 1.376061  | -0.132865 |
| N     | 2.442321  | -1.700626 | -0.429092 |
| N     | 0.257177  | -1.309621 | 0.021260  |
| C     | 1.242554  | -2.214728 | -0.335939 |
| H     | 0.995514  | -3.254386 | -0.509467 |
| C     | 1.342814  | 2.052472  | 0.513963  |
| N     | 0.395247  | 1.110875  | 0.473281  |
| H     | 1.004674  | 3.053394  | 0.774566  |

| d4A 9 | X         | Y         | Z         |
|-------|-----------|-----------|-----------|
| C     | -1.162834 | -1.093543 | -0.138358 |
| C     | -1.914458 | -1.286789 | 1.157892  |
| C     | -3.196919 | -0.981073 | 0.982608  |
| C     | -3.427116 | -0.520722 | -0.434247 |
| O     | -2.131855 | -0.598250 | -1.050870 |
| H     | -0.725715 | -2.031232 | -0.505777 |
| H     | -1.432397 | -1.648852 | 2.057969  |
| H     | -3.987305 | -1.044236 | 1.723155  |
| H     | -4.107866 | -1.201702 | -0.970487 |
| C     | -4.005067 | 0.895731  | -0.551957 |
| H     | -5.067498 | 0.861615  | -0.261008 |
| H     | -3.955461 | 1.209380  | -1.597850 |
| O     | -3.294478 | 1.874968  | 0.188593  |
| H     | -3.322119 | 1.624098  | 1.122186  |
| N     | 3.967218  | -0.653308 | -0.090593 |
| C     | 1.298809  | -0.533025 | -0.074260 |
| C     | 2.000539  | 0.669665  | 0.046862  |
| C     | 3.406191  | 0.563484  | 0.037326  |
| N     | 4.214708  | 1.644996  | 0.178049  |
| H     | 3.811062  | 2.563844  | 0.089467  |
| H     | 5.197211  | 1.520450  | -0.008317 |
| N     | 1.137172  | 1.748649  | 0.139071  |
| N     | -0.034412 | -0.172180 | -0.042405 |
| C     | -0.057960 | 1.209174  | 0.083792  |
| H     | -0.999206 | 1.743174  | 0.095096  |
| C     | 3.158040  | -1.719927 | -0.194139 |
| N     | 1.821266  | -1.760966 | -0.190508 |
| H     | 3.662940  | -2.678472 | -0.294619 |

| d4A 10 | X         | Y         | Z         |
|--------|-----------|-----------|-----------|
| C      | -1.050824 | -1.038715 | 0.341577  |
| C      | -1.962225 | -0.872162 | 1.532317  |
| C      | -3.186257 | -0.550450 | 1.122083  |
| C      | -3.221795 | -0.483581 | -0.378690 |
| O      | -1.873121 | -0.751216 | -0.789746 |
| H      | -0.627957 | -2.045921 | 0.243341  |
| H      | -1.615382 | -1.001788 | 2.550398  |
| H      | -4.056869 | -0.354705 | 1.735556  |
| H      | -3.876376 | -1.272274 | -0.788212 |
| C      | -3.684555 | 0.866891  | -0.946050 |
| H      | -3.507437 | 0.879878  | -2.030384 |
| H      | -3.090507 | 1.671983  | -0.503383 |
| O      | -5.040534 | 1.129047  | -0.614127 |
| H      | -5.598154 | 0.570924  | -1.171746 |
| N      | 4.019440  | -0.622955 | -0.492217 |
| C      | 1.404820  | -0.507732 | 0.045924  |
| C      | 2.139824  | 0.676240  | 0.148955  |
| C      | 3.516862  | 0.574017  | -0.138807 |
| N      | 4.356084  | 1.635533  | -0.049687 |
| H      | 3.967630  | 2.558775  | 0.055145  |
| H      | 5.290814  | 1.528742  | -0.410163 |
| N      | 1.332930  | 1.739008  | 0.523082  |
| N      | 0.108725  | -0.156276 | 0.379623  |
| C      | 0.143314  | 1.203405  | 0.644237  |
| H      | -0.752574 | 1.736292  | 0.931152  |
| C      | 3.184884  | -1.674043 | -0.543866 |
| N      | 1.872547  | -1.715331 | -0.291557 |
| H      | 3.643683  | -2.617625 | -0.831518 |



| d4A 11 | X         | Y         | Z         |
|--------|-----------|-----------|-----------|
| C      | -1.111501 | 0.759949  | 0.991978  |
| C      | -1.550232 | 1.669814  | -0.127618 |
| C      | -2.783825 | 1.340324  | -0.499547 |
| C      | -3.285795 | 0.189653  | 0.324827  |
| O      | -2.209542 | -0.092398 | 1.244722  |
| H      | -0.849034 | 1.302205  | 1.910411  |
| H      | -0.899147 | 2.435860  | -0.527272 |
| H      | -3.375880 | 1.789666  | -1.286789 |
| H      | -4.175675 | 0.462156  | 0.909184  |
| C      | -3.616804 | -1.067854 | -0.482626 |
| H      | -3.822588 | -1.892297 | 0.216503  |
| H      | -2.742962 | -1.343107 | -1.091369 |
| O      | -4.748324 | -0.748746 | -1.279900 |
| H      | -4.960482 | -1.515035 | -1.826512 |
| N      | 3.829720  | 0.789840  | -0.543627 |
| C      | 1.294502  | 0.424503  | 0.224127  |
| C      | 2.095473  | -0.712423 | 0.068085  |
| C      | 3.424217  | -0.477139 | -0.342571 |
| N      | 4.302571  | -1.487599 | -0.562163 |
| H      | 4.063189  | -2.415722 | -0.252493 |
| H      | 5.271602  | -1.246247 | -0.696440 |
| N      | 1.395873  | -1.865720 | 0.371930  |
| N      | 0.065414  | -0.057062 | 0.624019  |
| C      | 0.200890  | -1.430609 | 0.702301  |
| H      | -0.628656 | -2.045912 | 1.015568  |
| C      | 2.942963  | 1.780534  | -0.353563 |
| N      | 1.663568  | 1.699508  | 0.025536  |
| H      | 3.323220  | 2.784298  | -0.531595 |

| d4A 12 | X         | Y         | Z         |
|--------|-----------|-----------|-----------|
| C      | -1.157374 | -1.639291 | 0.147855  |
| C      | -1.789870 | -1.161041 | 1.430735  |
| C      | -2.832456 | -0.386633 | 1.150031  |
| C      | -2.985264 | -0.247257 | -0.337110 |
| O      | -1.920574 | -1.045216 | -0.888851 |
| H      | -1.193668 | -2.734616 | 0.045998  |
| H      | -1.403697 | -1.431700 | 2.405669  |
| H      | -3.481356 | 0.123235  | 1.850775  |
| H      | -3.942612 | -0.672483 | -0.683230 |
| C      | -2.878480 | 1.201781  | -0.837394 |
| H      | -2.789710 | 1.196023  | -1.933035 |
| H      | -1.975109 | 1.652866  | -0.421253 |
| O      | -3.986650 | 1.974320  | -0.390069 |
| H      | -4.761308 | 1.707683  | -0.902305 |
| N      | 2.651390  | 1.942466  | 0.278618  |
| C      | 0.904282  | -0.089946 | 0.146763  |
| C      | 2.249130  | -0.360712 | -0.130216 |
| C      | 3.136536  | 0.733238  | -0.053397 |
| N      | 4.458502  | 0.608470  | -0.321995 |
| H      | 4.853972  | -0.309155 | -0.445095 |
| H      | 5.059918  | 1.394206  | -0.134258 |
| N      | 2.450110  | -1.697103 | -0.431312 |
| N      | 0.263291  | -1.313644 | 0.015782  |
| C      | 1.252245  | -2.215620 | -0.340655 |
| H      | 1.009064  | -3.256024 | -0.515292 |
| C      | 1.333555  | 2.052551  | 0.510640  |
| N      | 0.390811  | 1.105935  | 0.469004  |
| H      | 0.989755  | 3.051843  | 0.769194  |

| d4A 13 | X         | Y         | Z         |
|--------|-----------|-----------|-----------|
| C      | -1.178298 | -1.642197 | 0.171467  |
| C      | -1.815224 | -1.124196 | 1.436394  |
| C      | -2.851507 | -0.352653 | 1.125507  |
| C      | -2.998471 | -0.255349 | -0.366461 |
| O      | -1.942076 | -1.089700 | -0.885434 |
| H      | -1.209593 | -2.740388 | 0.107869  |
| H      | -1.442431 | -1.375672 | 2.421657  |
| H      | -3.511869 | 0.156294  | 1.817285  |
| H      | -3.962132 | -0.667113 | -0.699795 |
| C      | -2.854570 | 1.168537  | -0.928397 |
| H      | -2.911539 | 1.121983  | -2.020438 |
| H      | -1.871317 | 1.559966  | -0.645983 |
| O      | -3.924383 | 1.997229  | -0.481649 |
| H      | -3.648409 | 2.407762  | 0.346671  |
| N      | 2.644116  | 1.934330  | 0.263957  |
| C      | 0.889857  | -0.095574 | 0.164684  |
| C      | 2.233184  | -0.372265 | -0.114668 |
| C      | 3.125415  | 0.718158  | -0.048167 |
| N      | 4.455039  | 0.575458  | -0.268584 |
| H      | 4.797365  | -0.290922 | -0.651514 |
| H      | 5.012778  | 1.410384  | -0.351373 |
| N      | 2.427259  | -1.708364 | -0.420069 |
| N      | 0.243654  | -1.316945 | 0.036904  |
| C      | 1.227741  | -2.222049 | -0.325219 |
| H      | 0.979319  | -3.260913 | -0.501507 |
| C      | 1.328786  | 2.049877  | 0.503915  |
| N      | 0.382589  | 1.105574  | 0.480723  |
| H      | 0.989434  | 3.054283  | 0.748938  |

| d4A 14 | X         | Y         | Z         |
|--------|-----------|-----------|-----------|
| C      | -1.188401 | -0.958487 | -0.833247 |
| C      | -1.510901 | -1.894795 | 0.305374  |
| C      | -2.716174 | -1.596716 | 0.782832  |
| C      | -3.298660 | -0.429671 | 0.029801  |
| O      | -2.347683 | -0.184022 | -1.027690 |
| H      | -0.936232 | -1.481272 | -1.764699 |
| H      | -0.815115 | -2.652552 | 0.640712  |
| H      | -3.222270 | -2.080245 | 1.610551  |
| H      | -4.259395 | -0.660598 | -0.449647 |
| C      | -3.486805 | 0.808733  | 0.904339  |
| H      | -2.517939 | 1.078447  | 1.349839  |
| H      | -4.174981 | 0.548558  | 1.726157  |
| O      | -4.006042 | 1.846862  | 0.090536  |
| H      | -4.068843 | 2.646811  | 0.627173  |
| N      | 3.844866  | -0.645277 | 0.329731  |
| C      | 1.239325  | -0.459255 | -0.235065 |
| C      | 1.953003  | 0.733347  | -0.069570 |
| C      | 3.323651  | 0.591316  | 0.230926  |
| N      | 4.131518  | 1.660404  | 0.446072  |
| H      | 3.795658  | 2.578248  | 0.202072  |
| H      | 5.124535  | 1.495182  | 0.491321  |
| N      | 1.138024  | 1.835790  | -0.251694 |
| N      | -0.050578 | -0.066028 | -0.517388 |
| C      | -0.039433 | 1.317115  | -0.520946 |
| H      | -0.943965 | 1.868389  | -0.732771 |
| C      | 3.030179  | -1.697511 | 0.147450  |
| N      | 1.723327  | -1.707093 | -0.134762 |
| H      | 3.503540  | -2.672710 | 0.241449  |

| d4A 15 | X         | Y         | Z         |
|--------|-----------|-----------|-----------|
| C      | -1.102420 | 0.762156  | 0.970398  |
| C      | -1.541769 | 1.663074  | -0.156378 |
| C      | -2.779520 | 1.338282  | -0.518320 |
| C      | -3.284374 | 0.198971  | 0.319269  |
| O      | -2.202234 | -0.086841 | 1.231174  |
| H      | -0.837688 | 1.312798  | 1.883313  |
| H      | -0.886892 | 2.418823  | -0.569339 |
| H      | -3.369913 | 1.780016  | -1.311291 |
| H      | -4.160121 | 0.493213  | 0.920289  |
| C      | -3.646291 | -1.061091 | -0.482799 |
| H      | -3.814333 | -1.895755 | 0.212894  |
| H      | -2.809616 | -1.328037 | -1.134703 |
| O      | -4.764269 | -0.828110 | -1.326083 |
| H      | -5.556286 | -0.800061 | -0.773396 |
| N      | 3.848291  | 0.786866  | -0.518349 |
| C      | 1.306240  | 0.422383  | 0.224510  |
| C      | 2.103604  | -0.715822 | 0.062164  |
| C      | 3.436547  | -0.481068 | -0.335347 |
| N      | 4.312592  | -1.491714 | -0.558692 |
| H      | 4.064565  | -2.425432 | -0.274158 |
| H      | 5.282389  | -1.254638 | -0.693848 |
| N      | 1.396359  | -1.869591 | 0.345854  |
| N      | 0.071669  | -0.058622 | 0.607961  |
| C      | 0.200099  | -1.434038 | 0.670052  |
| H      | -0.634684 | -2.050043 | 0.967492  |
| C      | 2.963929  | 1.778670  | -0.324017 |
| N      | 1.680939  | 1.698304  | 0.043575  |
| H      | 3.349391  | 2.782905  | -0.487610 |

| d4A 16 | X         | Y         | Z         |
|--------|-----------|-----------|-----------|
| C      | -1.127899 | -1.096885 | 0.266073  |
| C      | -1.960229 | -1.200381 | 1.519499  |
| C      | -3.195630 | -0.773472 | 1.272928  |
| C      | -3.321006 | -0.360100 | -0.169151 |
| O      | -2.007994 | -0.565642 | -0.717566 |
| H      | -0.725592 | -2.057783 | -0.077322 |
| H      | -1.562659 | -1.577187 | 2.454102  |
| H      | -4.019535 | -0.734002 | 1.976401  |
| H      | -4.025161 | -1.009150 | -0.712214 |
| C      | -3.786188 | 1.079532  | -0.370414 |
| H      | -2.993976 | 1.756603  | -0.018388 |
| H      | -4.680458 | 1.250215  | 0.253657  |
| O      | -4.071136 | 1.258913  | -1.746256 |
| H      | -4.168040 | 2.203783  | -1.916088 |
| N      | 3.904855  | -0.536819 | -0.715479 |
| C      | 1.322018  | -0.527583 | -0.030624 |
| C      | 2.079921  | 0.603896  | 0.284271  |
| C      | 3.439032  | 0.559015  | -0.089645 |
| N      | 4.299229  | 1.572872  | 0.181394  |
| H      | 3.927933  | 2.457338  | 0.488609  |
| H      | 5.208740  | 1.543627  | -0.251430 |
| N      | 1.308634  | 1.566510  | 0.915911  |
| N      | 0.049580  | -0.249331 | 0.435474  |
| C      | 0.118434  | 1.021780  | 0.980522  |
| H      | -0.754557 | 1.485528  | 1.418253  |
| C      | 3.052737  | -1.549390 | -0.945903 |
| N      | 1.754447  | -1.637795 | -0.639972 |
| H      | 3.481991  | -2.411678 | -1.451614 |

| d4A 17 | X         | Y         | Z         |
|--------|-----------|-----------|-----------|
| C      | -1.051906 | -1.050954 | 0.314527  |
| C      | -1.961835 | -0.903739 | 1.508954  |
| C      | -3.188835 | -0.587412 | 1.102712  |
| C      | -3.230023 | -0.501221 | -0.398525 |
| O      | -1.878559 | -0.762581 | -0.810705 |
| H      | -0.621134 | -2.054328 | 0.210473  |
| H      | -1.615757 | -1.052442 | 2.524739  |
| H      | -4.058659 | -0.436749 | 1.732019  |
| H      | -3.889467 | -1.277034 | -0.815624 |
| C      | -3.683450 | 0.853973  | -0.965498 |
| H      | -3.577498 | 0.828873  | -2.053626 |
| H      | -3.025533 | 1.648862  | -0.586083 |
| O      | -5.053006 | 1.106699  | -0.688240 |
| H      | -5.122566 | 1.427841  | 0.219353  |
| N      | 4.024265  | -0.611678 | -0.468778 |
| C      | 1.403793  | -0.506910 | 0.040754  |
| C      | 2.132466  | 0.680422  | 0.150109  |
| C      | 3.513067  | 0.583703  | -0.122724 |
| N      | 4.346996  | 1.648687  | -0.026230 |
| H      | 3.953634  | 2.570737  | 0.070627  |
| H      | 5.285544  | 1.544897  | -0.377706 |
| N      | 1.316775  | 1.740126  | 0.513799  |
| N      | 0.102419  | -0.160840 | 0.359751  |
| C      | 0.128568  | 1.199067  | 0.623009  |
| H      | -0.772417 | 1.729084  | 0.898587  |
| C      | 3.194985  | -1.666512 | -0.527764 |
| N      | 1.880201  | -1.712968 | -0.289303 |
| H      | 3.660796  | -2.608479 | -0.809204 |

| d4A 18 | X         | Y         | Z         |
|--------|-----------|-----------|-----------|
| C      | -1.183762 | -0.970595 | -0.784468 |
| C      | -1.522003 | -1.879639 | 0.371817  |
| C      | -2.739708 | -1.583291 | 0.818211  |
| C      | -3.314346 | -0.439080 | 0.025625  |
| O      | -2.344173 | -0.204039 | -1.013547 |
| H      | -0.917113 | -1.517303 | -1.697944 |
| H      | -0.825321 | -2.620661 | 0.741445  |
| H      | -3.256151 | -2.048109 | 1.650136  |
| H      | -4.257817 | -0.710417 | -0.474832 |
| C      | -3.543745 | 0.826588  | 0.865349  |
| H      | -2.626085 | 1.071907  | 1.407562  |
| H      | -4.325882 | 0.610306  | 1.612609  |
| O      | -3.852284 | 1.966000  | 0.085534  |
| H      | -4.635692 | 1.771696  | -0.446571 |
| N      | 3.861174  | -0.644714 | 0.270614  |
| C      | 1.244390  | -0.461012 | -0.233906 |
| C      | 1.952305  | 0.731506  | -0.049162 |
| C      | 3.329941  | 0.590886  | 0.218238  |
| N      | 4.134821  | 1.658641  | 0.446325  |
| H      | 3.785705  | 2.582462  | 0.248254  |
| H      | 5.129448  | 1.500734  | 0.475911  |
| N      | 1.125089  | 1.831971  | -0.180093 |
| N      | -0.054032 | -0.069941 | -0.477265 |
| C      | -0.055153 | 1.314016  | -0.437086 |
| H      | -0.967861 | 1.866350  | -0.609068 |
| C      | 3.049995  | -1.697094 | 0.075479  |
| N      | 1.737157  | -1.708124 | -0.179082 |
| H      | 3.531477  | -2.671193 | 0.132542  |

| d4A 19 | X         | Y         | Z         |
|--------|-----------|-----------|-----------|
| C      | 1.121033  | 0.733751  | -1.036156 |
| C      | 1.556400  | 1.677595  | 0.056889  |
| C      | 2.785991  | 1.352497  | 0.446435  |
| C      | 3.287809  | 0.167846  | -0.330391 |
| O      | 2.220777  | -0.122783 | -1.261139 |
| H      | 0.862882  | 1.250391  | -1.970521 |
| H      | 0.908438  | 2.462066  | 0.424552  |
| H      | 3.373686  | 1.849036  | 1.209936  |
| H      | 4.190263  | 0.411228  | -0.907790 |
| C      | 3.586110  | -1.078963 | 0.519872  |
| H      | 3.852248  | -1.904312 | -0.147334 |
| H      | 2.680175  | -1.367792 | 1.070524  |
| O      | 4.697004  | -0.866481 | 1.377849  |
| H      | 4.386201  | -0.390871 | 2.158285  |
| N      | -3.799058 | 0.808577  | 0.570015  |
| C      | -1.276699 | 0.421862  | -0.229712 |
| C      | -2.087959 | -0.707357 | -0.072876 |
| C      | -3.409555 | -0.461332 | 0.354856  |
| N      | -4.295749 | -1.463563 | 0.575490  |
| H      | -4.067197 | -2.394429 | 0.266136  |
| H      | -5.259632 | -1.215170 | 0.731428  |
| N      | -1.404678 | -1.866009 | -0.392825 |
| N      | -0.057025 | -0.070473 | -0.646313 |
| C      | -0.209051 | -1.442530 | -0.734374 |
| H      | 0.610688  | -2.064886 | -1.059570 |
| C      | -2.904342 | 1.791015  | 0.376568  |
| N      | -1.630151 | 1.699337  | -0.018069 |
| H      | -3.271799 | 2.797466  | 0.565919  |

| d4A 20 | X         | Y         | Z         |
|--------|-----------|-----------|-----------|
| C      | -1.122423 | -1.060171 | 0.245129  |
| C      | -1.934841 | -1.194292 | 1.509062  |
| C      | -3.187518 | -0.809958 | 1.280725  |
| C      | -3.339642 | -0.383842 | -0.155825 |
| O      | -2.022931 | -0.508601 | -0.711744 |
| H      | -0.725142 | -2.015612 | -0.120514 |
| H      | -1.513045 | -1.564669 | 2.435612  |
| H      | -4.003823 | -0.804237 | 1.993965  |
| H      | -4.007065 | -1.080450 | -0.695034 |
| C      | -3.889977 | 1.035068  | -0.336462 |
| H      | -3.198773 | 1.749870  | 0.119748  |
| H      | -4.849044 | 1.103119  | 0.206085  |
| O      | -4.019572 | 1.422052  | -1.689214 |
| H      | -4.627807 | 0.808605  | -2.122902 |
| N      | 3.922690  | -0.566689 | -0.682595 |
| C      | 1.330628  | -0.516086 | -0.038194 |
| C      | 2.095435  | 0.613008  | 0.266670  |
| C      | 3.459291  | 0.546694  | -0.085987 |
| N      | 4.326009  | 1.556793  | 0.177452  |
| H      | 3.958383  | 2.451953  | 0.457289  |
| H      | 5.240268  | 1.510294  | -0.243836 |
| N      | 1.324713  | 1.595942  | 0.867004  |
| N      | 0.054063  | -0.214742 | 0.402122  |
| C      | 0.127699  | 1.066528  | 0.923571  |
| H      | -0.747539 | 1.550674  | 1.333563  |
| C      | 3.063566  | -1.574407 | -0.906211 |
| N      | 1.759571  | -1.642909 | -0.618716 |
| H      | 3.490991  | -2.451169 | -1.388050 |

| d4A 21 | X         | Y         | Z         |
|--------|-----------|-----------|-----------|
| C      | 3.053129  | 0.001607  | -0.024920 |
| O      | 2.096859  | 0.800707  | -0.747375 |
| C      | 1.299946  | 1.554347  | 0.147460  |
| C      | 1.813879  | 1.214022  | 1.523475  |
| C      | 2.817042  | 0.349337  | 1.419573  |
| C      | 2.883240  | -1.489611 | -0.336912 |
| O      | 3.120606  | -1.803423 | -1.697590 |
| H      | 1.407078  | 2.624985  | -0.083875 |
| H      | 1.391825  | 1.637826  | 2.426283  |
| H      | 3.384972  | -0.082717 | 2.235169  |
| H      | 4.059122  | 0.318560  | -0.351216 |
| H      | 1.850869  | -1.772181 | -0.118541 |
| H      | 3.546632  | -2.059985 | 0.336175  |
| H      | 4.041935  | -1.591577 | -1.898863 |
| N      | -0.126479 | 1.287543  | -0.043180 |
| C      | -0.852744 | 0.135184  | 0.220991  |
| N      | -0.442305 | -1.019742 | 0.764412  |
| C      | -1.441055 | -1.903676 | 0.856355  |
| N      | -2.725434 | -1.767348 | 0.491048  |
| C      | -2.152038 | 0.425884  | -0.210548 |
| C      | -3.109115 | -0.597110 | -0.048307 |
| N      | -2.241255 | 1.702288  | -0.739530 |
| C      | -1.023527 | 2.166923  | -0.627250 |
| H      | -1.180483 | -2.869655 | 1.283789  |
| N      | -4.409175 | -0.430637 | -0.397903 |
| H      | -4.662942 | 0.368329  | -0.956601 |
| H      | -4.998942 | -1.247671 | -0.410088 |
| H      | -0.699795 | 3.149630  | -0.945951 |

**Table SVIII.** Cartesian coordinates (in Å) of the 20 d4G conformers located in this work (listed in decreasing order of stability)

| d4G 1 | X         | Y         | Z         | d4G 2 | X         | Y         | Z         |
|-------|-----------|-----------|-----------|-------|-----------|-----------|-----------|
| C     | -1.490004 | -1.674894 | -0.013538 | C     | -1.316803 | -1.000610 | 0.465361  |
| C     | -2.140652 | -1.274261 | 1.288929  | C     | -2.301224 | -0.819622 | 1.592436  |
| C     | -3.106546 | -0.393335 | 1.048789  | C     | -3.529118 | -0.692147 | 1.099980  |
| C     | -3.178854 | -0.085438 | -0.422804 | C     | -3.506103 | -0.813136 | -0.398758 |
| O     | -2.075916 | -0.834201 | -0.990603 | O     | -2.108746 | -0.959101 | -0.723360 |
| H     | -1.685127 | -2.732401 | -0.252851 | H     | -0.768479 | -1.949248 | 0.503285  |
| H     | -1.843381 | -1.694177 | 2.242129  | H     | -1.995677 | -0.792392 | 2.631241  |
| H     | -3.758531 | 0.070839  | 1.778850  | H     | -4.441542 | -0.540399 | 1.665072  |
| H     | -4.110697 | -0.468729 | -0.869821 | H     | -4.039926 | -1.722045 | -0.722364 |
| C     | -3.055509 | 1.404189  | -0.770933 | C     | -4.078313 | 0.377704  | -1.177001 |
| H     | -4.031503 | 1.877704  | -0.604526 | H     | -5.124354 | 0.530250  | -0.889208 |
| H     | -2.836961 | 1.475617  | -1.849139 | H     | -4.061236 | 0.134160  | -2.249701 |
| O     | -2.110712 | 2.083949  | 0.022438  | O     | -3.391665 | 1.583313  | -0.907479 |
| H     | -1.303607 | 1.517263  | 0.071490  | H     | -2.488007 | 1.464155  | -1.233083 |
| N     | 2.612141  | 1.397414  | 0.082644  | N     | 3.604332  | -0.069716 | -0.265319 |
| C     | 1.289530  | 1.737594  | 0.153493  | C     | 2.931805  | -1.264108 | -0.259189 |
| C     | 0.759343  | -0.440593 | 0.033862  | C     | 1.050152  | -0.165543 | 0.182045  |
| C     | 2.073247  | -0.894400 | -0.063000 | C     | 1.624510  | 1.103992  | 0.213683  |
| C     | 3.150093  | 0.063589  | -0.032355 | C     | 3.038591  | 1.233711  | -0.030161 |
| N     | 2.111474  | -2.268259 | -0.200554 | N     | 0.672603  | 2.069415  | 0.479186  |
| C     | 0.856190  | -2.627386 | -0.193678 | C     | -0.445378 | 1.403358  | 0.609531  |
| H     | 0.491081  | -3.641550 | -0.288938 | H     | -1.416938 | 1.828881  | 0.818187  |
| N     | 0.961245  | 3.059811  | 0.282526  | N     | 3.660241  | -2.391776 | -0.563623 |
| H     | 1.598674  | 3.749753  | -0.085669 | H     | 4.625175  | -2.418076 | -0.265405 |
| O     | 4.356973  | -0.083295 | -0.085714 | O     | 3.763281  | 2.211705  | -0.070440 |
| H     | 3.326743  | 2.112608  | 0.143334  | H     | 4.585234  | -0.040807 | -0.515778 |
| N     | 0.326156  | 0.841058  | 0.141939  | N     | 1.644461  | -1.368803 | -0.027885 |
| H     | -0.023759 | 3.258522  | 0.142290  | H     | 3.149669  | -3.246650 | -0.391140 |
| N     | -0.029119 | -1.565376 | -0.044942 | N     | -0.286723 | 0.029915  | 0.445006  |

| d4G 3 | X         | Y         | Z         |
|-------|-----------|-----------|-----------|
| C     | -1.297821 | 0.858090  | -0.689990 |
| C     | -2.239282 | 0.597740  | -1.839373 |
| C     | -3.479042 | 0.438431  | -1.382553 |
| C     | -3.503178 | 0.579589  | 0.112441  |
| O     | -2.130167 | 0.851039  | 0.469442  |
| H     | -0.779166 | 1.821656  | -0.752379 |
| H     | -1.901899 | 0.553096  | -2.867861 |
| H     | -4.364699 | 0.238654  | -1.974911 |
| H     | -4.107517 | 1.440113  | 0.435176  |
| C     | -3.976456 | -0.654949 | 0.885619  |
| H     | -3.407128 | -1.533246 | 0.541773  |
| H     | -5.036925 | -0.838413 | 0.680147  |
| O     | -3.852204 | -0.458512 | 2.278896  |
| H     | -2.924797 | -0.228116 | 2.436225  |
| N     | 3.594762  | 0.143527  | 0.370496  |
| C     | 2.879105  | 1.309171  | 0.280722  |
| C     | 1.074918  | 0.122468  | -0.246349 |
| C     | 1.697496  | -1.122972 | -0.197186 |
| C     | 3.096186  | -1.188342 | 0.142185  |
| N     | 0.802027  | -2.133452 | -0.493063 |
| C     | -0.327256 | -1.515252 | -0.716467 |
| H     | -1.261012 | -1.989254 | -0.983341 |
| N     | 3.541071  | 2.473988  | 0.594689  |
| H     | 4.523203  | 2.530387  | 0.364940  |
| O     | 3.853222  | -2.134775 | 0.261551  |
| H     | 4.557191  | 0.161604  | 0.685447  |
| N     | 1.606907  | 1.354429  | -0.038102 |
| H     | 3.011351  | 3.302416  | 0.361787  |
| N     | -0.233827 | -0.133458 | -0.591223 |

| d4G 4 | X         | Y         | Z         |
|-------|-----------|-----------|-----------|
| C     | -1.267148 | -1.066523 | 0.211023  |
| C     | -2.162114 | -1.083693 | 1.425565  |
| C     | -3.429425 | -0.935414 | 1.054541  |
| C     | -3.515604 | -0.818662 | -0.443777 |
| O     | -2.152294 | -0.894313 | -0.890926 |
| H     | -0.691045 | -1.991142 | 0.084160  |
| H     | -1.773631 | -1.192088 | 2.430821  |
| H     | -4.297199 | -0.893652 | 1.702114  |
| H     | -4.065042 | -1.670373 | -0.877618 |
| C     | -4.190981 | 0.451742  | -0.958193 |
| H     | -5.280024 | 0.341187  | -0.828719 |
| H     | -3.985814 | 0.526753  | -2.034223 |
| O     | -3.706545 | 1.581688  | -0.246710 |
| H     | -3.824576 | 2.364795  | -0.797439 |
| N     | 3.667864  | 0.003637  | -0.169037 |
| C     | 3.032789  | -1.210316 | -0.201179 |
| C     | 1.091430  | -0.164883 | 0.087373  |
| C     | 1.624326  | 1.121716  | 0.148102  |
| C     | 3.046982  | 1.291567  | 0.008834  |
| N     | 0.624948  | 2.060474  | 0.325873  |
| C     | -0.479440 | 1.360734  | 0.378771  |
| H     | -1.483207 | 1.748031  | 0.480430  |
| N     | 3.817609  | -2.318572 | -0.441292 |
| H     | 4.750468  | -2.314147 | -0.052317 |
| O     | 3.745822  | 2.290149  | 0.011178  |
| H     | 4.663143  | 0.060515  | -0.347142 |
| N     | 1.736516  | -1.352431 | -0.063758 |
| H     | 3.317973  | -3.184823 | -0.293937 |
| N     | -0.265767 | -0.006373 | 0.245239  |



| d4G 5 | X         | Y         | Z         |
|-------|-----------|-----------|-----------|
| C     | -1.193287 | -0.911790 | 0.576782  |
| C     | -2.196163 | -0.638428 | 1.669878  |
| C     | -3.412132 | -0.514276 | 1.144187  |
| C     | -3.349441 | -0.712459 | -0.344319 |
| O     | -1.962191 | -0.954365 | -0.623443 |
| H     | -0.654237 | -1.859143 | 0.691981  |
| H     | -1.911536 | -0.552680 | 2.711633  |
| H     | -4.337026 | -0.303052 | 1.666003  |
| H     | -3.932595 | -1.594086 | -0.649239 |
| C     | -3.840110 | 0.481456  | -1.166617 |
| H     | -3.628538 | 0.285740  | -2.227732 |
| H     | -3.278227 | 1.379772  | -0.870122 |
| O     | -5.232026 | 0.609688  | -0.910361 |
| H     | -5.569669 | 1.346334  | -1.434120 |
| N     | 3.712362  | -0.074087 | -0.343116 |
| C     | 3.027777  | -1.258602 | -0.254529 |
| C     | 1.174819  | -0.117281 | 0.198766  |
| C     | 1.763458  | 1.144983  | 0.146569  |
| C     | 3.168770  | 1.245633  | -0.153207 |
| N     | 0.831317  | 2.133768  | 0.398785  |
| C     | -0.285978 | 1.485376  | 0.598552  |
| H     | -1.240263 | 1.935256  | 0.832537  |
| N     | 3.733442  | -2.408652 | -0.529573 |
| H     | 4.706766  | -2.433031 | -0.259604 |
| O     | 3.901712  | 2.212118  | -0.267165 |
| H     | 4.683198  | -0.069449 | -0.631430 |
| N     | 1.749098  | -1.336376 | 0.027482  |
| H     | 3.218982  | -3.247282 | -0.298500 |
| N     | -0.149519 | 0.105979  | 0.500705  |

| d4G 6 | X         | Y         | Z         |
|-------|-----------|-----------|-----------|
| C     | 1.481192  | -1.550805 | -0.423889 |
| C     | 1.920921  | -0.898968 | -1.710705 |
| C     | 2.887054  | -0.021098 | -1.461208 |
| C     | 3.163568  | 0.043177  | 0.013460  |
| O     | 2.246241  | -0.915012 | 0.591778  |
| H     | 1.699778  | -2.629142 | -0.418251 |
| H     | 1.491263  | -1.159799 | -2.670024 |
| H     | 3.409283  | 0.588681  | -2.189448 |
| H     | 4.184350  | -0.283295 | 0.262021  |
| C     | 2.914513  | 1.406244  | 0.663719  |
| H     | 1.907155  | 1.743944  | 0.383216  |
| H     | 3.647066  | 2.131419  | 0.291357  |
| O     | 3.080451  | 1.337219  | 2.068210  |
| H     | 2.474525  | 0.646238  | 2.373023  |
| N     | -2.761538 | 1.324566  | -0.066576 |
| C     | -1.496781 | 1.711919  | -0.423816 |
| C     | -0.801535 | -0.389320 | -0.161339 |
| C     | -2.041861 | -0.892504 | 0.232751  |
| C     | -3.173562 | -0.002499 | 0.300744  |
| N     | -1.972961 | -2.246824 | 0.493703  |
| C     | -0.725641 | -2.553233 | 0.266627  |
| H     | -0.289286 | -3.538016 | 0.371880  |
| N     | -1.330539 | 3.029908  | -0.787110 |
| H     | -1.894460 | 3.717395  | -0.306945 |
| O     | -4.337895 | -0.206184 | 0.594046  |
| H     | -3.526195 | 1.987856  | -0.102912 |
| N     | -0.474358 | 0.891412  | -0.481067 |
| H     | -0.358920 | 3.290723  | -0.882825 |
| N     | 0.050518  | -1.476446 | -0.147727 |

| d4G 7 | X         | Y         | Z         |
|-------|-----------|-----------|-----------|
| C     | 1.397712  | 0.698928  | -1.007941 |
| C     | 1.649139  | 1.726670  | 0.066200  |
| C     | 2.896938  | 1.602182  | 0.506197  |
| C     | 3.606309  | 0.492763  | -0.217548 |
| O     | 2.607867  | -0.017524 | -1.137527 |
| H     | 1.129093  | 1.146551  | -1.975047 |
| H     | 0.881733  | 2.416184  | 0.389309  |
| H     | 3.369621  | 2.189003  | 1.285055  |
| H     | 4.449788  | 0.869173  | -0.817190 |
| C     | 4.124393  | -0.641125 | 0.672656  |
| H     | 4.970796  | -0.265467 | 1.258626  |
| H     | 4.505199  | -1.442502 | 0.020447  |
| O     | 3.171656  | -1.113984 | 1.599980  |
| H     | 2.414341  | -1.454145 | 1.103027  |
| N     | -3.484141 | 0.176152  | 0.340128  |
| C     | -2.748517 | 1.317359  | 0.153856  |
| C     | -0.971996 | 0.058651  | -0.313360 |
| C     | -1.617494 | -1.168586 | -0.147642 |
| C     | -3.012342 | -1.178451 | 0.214810  |
| N     | -0.756763 | -2.215009 | -0.395712 |
| C     | 0.379619  | -1.638622 | -0.702572 |
| H     | 1.286868  | -2.143691 | -0.997625 |
| N     | -3.419091 | 2.515045  | 0.265111  |
| H     | -4.170278 | 2.566088  | 0.938919  |
| O     | -3.788595 | -2.097270 | 0.404000  |
| H     | -4.478468 | 0.237474  | 0.522814  |
| N     | -1.475902 | 1.315609  | -0.166031 |
| H     | -2.798767 | 3.312588  | 0.278153  |
| N     | 0.320194  | -0.251745 | -0.655788 |

| d4G 8 | X         | Y         | Z         |
|-------|-----------|-----------|-----------|
| C     | -1.188897 | -0.873586 | 0.570424  |
| C     | -2.176434 | -0.594992 | 1.676412  |
| C     | -3.401677 | -0.485789 | 1.169536  |
| C     | -3.361432 | -0.693255 | -0.317944 |
| O     | -1.974539 | -0.905116 | -0.621049 |
| H     | -0.657952 | -1.826637 | 0.679345  |
| H     | -1.875480 | -0.496094 | 2.712371  |
| H     | -4.319087 | -0.273787 | 1.704339  |
| H     | -3.922753 | -1.600213 | -0.601295 |
| C     | -3.908127 | 0.485493  | -1.138168 |
| H     | -3.669893 | 0.325705  | -2.198739 |
| H     | -3.415348 | 1.409725  | -0.823065 |
| O     | -5.299568 | 0.665351  | -0.914949 |
| H     | -5.771270 | -0.029584 | -1.392251 |
| N     | 3.726744  | -0.102080 | -0.339076 |
| C     | 3.028562  | -1.277527 | -0.240208 |
| C     | 1.186315  | -0.109802 | 0.188554  |
| C     | 1.788818  | 1.145040  | 0.124224  |
| C     | 3.196976  | 1.226418  | -0.168059 |
| N     | 0.866056  | 2.146895  | 0.359545  |
| C     | -0.259406 | 1.514152  | 0.561079  |
| H     | -1.210000 | 1.978207  | 0.782490  |
| N     | 3.722530  | -2.438773 | -0.497596 |
| H     | 4.694254  | -2.470591 | -0.222697 |
| O     | 3.942139  | 2.182550  | -0.287492 |
| H     | 4.699492  | -0.111400 | -0.620783 |
| N     | 1.747493  | -1.337316 | 0.035469  |
| H     | 3.197705  | -3.268684 | -0.258592 |
| N     | -0.137409 | 0.131868  | 0.480471  |

| d4G 9 | X         | Y         | Z         |
|-------|-----------|-----------|-----------|
| C     | -1.281792 | -1.722055 | 0.359386  |
| C     | -1.846171 | -1.000137 | 1.556892  |
| C     | -2.869885 | -0.242483 | 1.178121  |
| C     | -3.073804 | -0.358393 | -0.306079 |
| O     | -2.045255 | -1.261683 | -0.746509 |
| H     | -1.392285 | -2.813402 | 0.446294  |
| H     | -1.442203 | -1.124598 | 2.553957  |
| H     | -3.483942 | 0.394465  | 1.802083  |
| H     | -4.055507 | -0.796159 | -0.541554 |
| C     | -2.948506 | 0.962297  | -1.067201 |
| H     | -2.965647 | 0.745170  | -2.145155 |
| H     | -1.981742 | 1.420766  | -0.819116 |
| O     | -4.052746 | 1.768527  | -0.667722 |
| H     | -4.030122 | 2.585169  | -1.180678 |
| N     | 2.697293  | 1.515659  | 0.030740  |
| C     | 1.388917  | 1.798650  | 0.323413  |
| C     | 0.895892  | -0.365798 | 0.124778  |
| C     | 2.192850  | -0.768343 | -0.197139 |
| C     | 3.241370  | 0.218076  | -0.262712 |
| N     | 2.259467  | -2.133872 | -0.390762 |
| C     | 1.036609  | -2.543887 | -0.192748 |
| H     | 0.696716  | -3.568923 | -0.263356 |
| N     | 1.092005  | 3.108636  | 0.632300  |
| H     | 1.603280  | 3.828357  | 0.140616  |
| O     | 4.430959  | 0.110865  | -0.502328 |
| H     | 3.398264  | 2.245327  | 0.076035  |
| N     | 0.441832  | 0.892930  | 0.371292  |
| H     | 0.098018  | 3.278935  | 0.696651  |
| N     | 0.149208  | -1.526828 | 0.137348  |

| d4G 10 | X         | Y         | Z         |
|--------|-----------|-----------|-----------|
| C      | -1.264105 | 0.871402  | -0.695741 |
| C      | -2.193816 | 0.609922  | -1.854190 |
| C      | -3.431631 | 0.429615  | -1.401443 |
| C      | -3.460376 | 0.572187  | 0.096690  |
| O      | -2.097894 | 0.858033  | 0.456403  |
| H      | -0.742915 | 1.834022  | -0.754114 |
| H      | -1.852653 | 0.577704  | -2.881849 |
| H      | -4.314199 | 0.222125  | -1.995798 |
| H      | -4.080289 | 1.426737  | 0.407981  |
| C      | -3.982970 | -0.658768 | 0.833451  |
| H      | -3.255484 | -1.473982 | 0.712107  |
| H      | -4.930556 | -0.975609 | 0.364368  |
| O      | -4.170967 | -0.306635 | 2.193076  |
| H      | -4.242676 | -1.118044 | 2.710023  |
| N      | 3.620966  | 0.128920  | 0.405076  |
| C      | 2.913527  | 1.299170  | 0.306132  |
| C      | 1.107175  | 0.124277  | -0.239794 |
| C      | 1.722311  | -1.125256 | -0.183091 |
| C      | 3.116284  | -1.199282 | 0.172081  |
| N      | 0.823868  | -2.130494 | -0.487202 |
| C      | -0.298969 | -1.503662 | -0.721982 |
| H      | -1.232841 | -1.971033 | -0.999870 |
| N      | 3.580563  | 2.459959  | 0.627464  |
| H      | 4.563278  | 2.511245  | 0.398539  |
| O      | 3.865944  | -2.150962 | 0.301114  |
| H      | 4.578810  | 0.141283  | 0.733793  |
| N      | 1.646188  | 1.352854  | -0.027838 |
| H      | 3.056040  | 3.290748  | 0.390888  |
| N      | -0.198410 | -0.123571 | -0.598000 |

| d4G 11 | X         | Y         | Z         |
|--------|-----------|-----------|-----------|
| C      | -1.276407 | -1.763336 | 0.306339  |
| C      | -1.853579 | -1.091625 | 1.527119  |
| C      | -2.862393 | -0.304923 | 1.168334  |
| C      | -3.043839 | -0.349040 | -0.322237 |
| O      | -2.034362 | -1.262272 | -0.786404 |
| H      | -1.380679 | -2.857746 | 0.346308  |
| H      | -1.461060 | -1.259499 | 2.522419  |
| H      | -3.470644 | 0.318718  | 1.811251  |
| H      | -4.030846 | -0.761894 | -0.592417 |
| C      | -2.869972 | 1.011664  | -1.013723 |
| H      | -2.842984 | 0.859663  | -2.102016 |
| H      | -1.913334 | 1.437521  | -0.703938 |
| O      | -3.886862 | 1.926864  | -0.622701 |
| H      | -4.712950 | 1.651379  | -1.041406 |
| N      | 2.650511  | 1.538805  | 0.047951  |
| C      | 1.331697  | 1.799754  | 0.313611  |
| C      | 0.883274  | -0.375082 | 0.114706  |
| C      | 2.192796  | -0.755346 | -0.181297 |
| C      | 3.223971  | 0.250348  | -0.229667 |
| N      | 2.285850  | -2.119427 | -0.375796 |
| C      | 1.066173  | -2.550239 | -0.204916 |
| H      | 0.745042  | -3.580695 | -0.284491 |
| N      | 1.002546  | 3.104710  | 0.605363  |
| H      | 1.515044  | 3.831386  | 0.125531  |
| O      | 4.419603  | 0.164268  | -0.446541 |
| H      | 3.336584  | 2.282204  | 0.098109  |
| N      | 0.402087  | 0.874944  | 0.350170  |
| H      | 0.004535  | 3.260394  | 0.643607  |
| N      | 0.155281  | -1.548370 | 0.108399  |

| d4G 12 | X         | Y         | Z         |
|--------|-----------|-----------|-----------|
| C      |           | -0.903231 | 0.562436  |
| C      | -2.185333 | -0.633466 | 1.664143  |
| C      | -3.407028 | -0.523477 | 1.148248  |
| C      | -3.359618 | -0.721703 | -0.341661 |
| O      | -1.969821 | -0.946900 | -0.630211 |
| H      | -0.650621 | -1.850453 | 0.677075  |
| H      | -1.893784 | -0.549430 | 2.704153  |
| H      | -4.325243 | -0.343209 | 1.695410  |
| H      | -3.933635 | -1.613092 | -0.635416 |
| C      | -3.873845 | 0.463362  | -1.176089 |
| H      | -3.703249 | 0.243402  | -2.233749 |
| H      | -3.297288 | 1.365248  | -0.927806 |
| O      | -5.272262 | 0.649898  | -1.009128 |
| H      | -5.413915 | 1.163096  | -0.204137 |
| N      | 3.720247  | -0.078505 | -0.331943 |
| C      | 3.032615  | -1.261198 | -0.243554 |
| C      | 1.178814  | -0.113865 | 0.190104  |
| C      | 1.769979  | 1.146900  | 0.136550  |
| C      | 3.178249  | 1.243286  | -0.151336 |
| N      | 0.837696  | 2.138708  | 0.376259  |
| C      | -0.282269 | 1.493835  | 0.570156  |
| H      | -1.237344 | 1.947607  | 0.792917  |
| N      | 3.737081  | -2.413634 | -0.508394 |
| H      | 4.709830  | -2.439090 | -0.236840 |
| O      | 3.914029  | 2.207644  | -0.262439 |
| H      | 4.693374  | -0.077038 | -0.612558 |
| N      | 1.751442  | -1.334849 | 0.029624  |
| H      | 3.219948  | -3.251058 | -0.279299 |
| N      | -0.147835 | 0.113455  | 0.480239  |

| d4G 13 | X         | Y         | Z         |
|--------|-----------|-----------|-----------|
| C      | -1.258072 | -1.037562 | -0.063058 |
| C      | -2.009249 | -1.258923 | 1.229268  |
| C      | -3.316043 | -1.135776 | 1.015688  |
| C      | -3.570786 | -0.788573 | -0.428807 |
| O      | -2.261916 | -0.725828 | -1.017973 |
| H      | -0.696515 | -1.928682 | -0.371611 |
| H      | -1.506537 | -1.500754 | 2.157972  |
| H      | -4.108584 | -1.260742 | 1.746011  |
| H      | -4.141161 | -1.583905 | -0.936083 |
| C      | -4.331831 | 0.527203  | -0.639039 |
| H      | -5.388865 | 0.360851  | -0.374591 |
| H      | -4.291047 | 0.788830  | -1.699565 |
| O      | -3.787403 | 1.632250  | 0.062217  |
| H      | -3.829213 | 1.439816  | 1.008903  |
| N      | 3.690091  | -0.002484 | -0.044740 |
| C      | 3.049076  | -1.211070 | -0.119763 |
| C      | 1.100580  | -0.143797 | -0.023304 |
| C      | 1.637398  | 1.139252  | 0.067821  |
| C      | 3.068807  | 1.294088  | 0.058883  |
| N      | 0.635040  | 2.087842  | 0.135917  |
| C      | -0.477691 | 1.399929  | 0.096378  |
| H      | -1.481678 | 1.801811  | 0.090494  |
| N      | 3.840468  | -2.328919 | -0.275119 |
| H      | 4.739609  | -2.326415 | 0.186170  |
| O      | 3.775163  | 2.285269  | 0.114915  |
| H      | 4.698167  | 0.043544  | -0.130015 |
| N      | 1.743815  | -1.340231 | -0.097186 |
| H      | 3.323604  | -3.190002 | -0.162010 |
| N      | -0.263370 | 0.028576  | 0.002077  |

| d4G 14 | X         | Y         | Z         |
|--------|-----------|-----------|-----------|
| C      | -3.086882 | 0.214802  | -0.090213 |
| O      | -2.124802 | -0.410750 | -0.973269 |
| C      | -1.602269 | -1.585422 | -0.399542 |
| C      | -2.320725 | -1.733740 | 0.921587  |
| C      | -3.195006 | -0.741321 | 1.064181  |
| C      | -2.600111 | 1.616612  | 0.350955  |
| O      | -2.003482 | 2.325380  | -0.715715 |
| H      | -1.793029 | -2.439395 | -1.066684 |
| H      | -2.129569 | -2.553413 | 1.603660  |
| H      | -3.859757 | -0.582211 | 1.905779  |
| H      | -4.018585 | 0.311993  | -0.662739 |
| H      | -1.895303 | 1.497396  | 1.184613  |
| H      | -3.459755 | 2.196765  | 0.704704  |
| H      | -1.239795 | 1.759011  | -0.944981 |
| N      | -0.128304 | -1.522345 | -0.294230 |
| C      | 0.703555  | -0.438132 | -0.123895 |
| N      | 0.339162  | 0.869802  | -0.097539 |
| C      | 1.339731  | 1.702506  | 0.083848  |
| N      | 2.638155  | 1.289055  | 0.207095  |
| C      | 1.991786  | -0.967175 | -0.034108 |
| C      | 3.107716  | -0.072451 | 0.150928  |
| N      | 1.971460  | -2.342027 | -0.147287 |
| C      | 0.706663  | -2.632519 | -0.304652 |
| H      | 0.304931  | -3.628808 | -0.436360 |
| H      | 3.371637  | 1.959927  | 0.401623  |
| N      | 1.067171  | 3.041006  | 0.202620  |
| H      | 1.764091  | 3.701258  | -0.109676 |
| H      | 0.107276  | 3.276115  | -0.030885 |
| O      | 4.299235  | -0.292885 | 0.269210  |

| d4G 15 | X         | Y         | Z         |
|--------|-----------|-----------|-----------|
| C      | 1.278859  | 0.930217  | -0.799598 |
| C      | 1.491804  | 1.883278  | 0.351929  |
| C      | 2.736804  | 1.752639  | 0.801475  |
| C      | 3.461435  | 0.692481  | 0.014878  |
| O      | 2.532410  | 0.332295  | -1.028132 |
| H      | 0.936789  | 1.429100  | -1.715208 |
| H      | 0.706368  | 2.531539  | 0.717036  |
| H      | 3.186126  | 2.288515  | 1.629775  |
| H      | 4.369162  | 1.065314  | -0.478389 |
| C      | 3.842054  | -0.518604 | 0.865604  |
| H      | 2.932353  | -0.925373 | 1.330659  |
| H      | 4.509018  | -0.174394 | 1.674211  |
| O      | 4.478560  | -1.463971 | 0.023618  |
| H      | 4.628387  | -2.269645 | 0.533782  |
| N      | -3.596313 | -0.037530 | 0.235227  |
| C      | -2.968048 | 1.161957  | 0.023730  |
| C      | -1.049594 | 0.068126  | -0.246767 |
| C      | -1.575101 | -1.208327 | -0.038424 |
| C      | -2.983146 | -1.341729 | 0.233362  |
| N      | -0.591764 | -2.168469 | -0.155286 |
| C      | 0.498113  | -1.491805 | -0.425477 |
| H      | 1.479692  | -1.903282 | -0.606513 |
| N      | -3.763643 | 2.287799  | 0.013492  |
| H      | -4.552261 | 2.301497  | 0.645318  |
| O      | -3.677488 | -2.321957 | 0.436739  |
| H      | -4.602633 | -0.070014 | 0.344534  |
| N      | -1.682233 | 1.274701  | -0.210983 |
| H      | -3.226724 | 3.143972  | 0.009780  |
| N      | 0.286352  | -0.121866 | -0.486316 |

| d4G 16 | X         | Y         | Z         |
|--------|-----------|-----------|-----------|
| C      | -3.490332 | 0.451278  | 0.361747  |
| O      | -2.390178 | 0.099222  | 1.228728  |
| C      | -1.207240 | 0.757592  | 0.826196  |
| C      | -1.596469 | 1.583649  | -0.375322 |
| C      | -2.889724 | 1.407646  | -0.630024 |
| C      | -4.092813 | -0.823726 | -0.251643 |
| O      | -5.253190 | -0.528355 | -1.015006 |
| H      | -0.815466 | 1.368971  | 1.650059  |
| H      | -0.881506 | 2.201918  | -0.902290 |
| H      | -3.463197 | 1.873472  | -1.423170 |
| H      | -4.269156 | 0.935470  | 0.967602  |
| H      | -4.403244 | -1.489821 | 0.558935  |
| H      | -3.325395 | -1.343477 | -0.841572 |
| H      | -4.971336 | -0.253399 | -1.896191 |
| N      | -0.167078 | -0.242134 | 0.517193  |
| C      | 1.146268  | 0.040443  | 0.241272  |
| N      | 1.687114  | 1.289266  | 0.184258  |
| C      | 2.971463  | 1.268847  | -0.085093 |
| N      | 3.678534  | 0.116680  | -0.310256 |
| C      | 1.755075  | -1.195468 | 0.020821  |
| C      | 3.161479  | -1.228750 | -0.288152 |
| N      | 0.844831  | -2.221915 | 0.163583  |
| C      | -0.282903 | -1.622903 | 0.457632  |
| H      | -1.223090 | -2.108874 | 0.665780  |
| H      | 4.680970  | 0.156119  | -0.449328 |
| N      | 3.681910  | 2.449045  | -0.099571 |
| H      | 4.457190  | 2.516725  | -0.744042 |
| H      | 3.086091  | 3.265081  | -0.084067 |
| O      | 3.918634  | -2.157170 | -0.507818 |

| d4G 17 | X         | Y         | Z         |
|--------|-----------|-----------|-----------|
| C      | -1.279750 | -1.750330 | 0.287103  |
| C      | -1.866145 | -1.095210 | 1.512564  |
| C      | -2.892109 | -0.328999 | 1.157455  |
| C      | -3.071317 | -0.359895 | -0.335592 |
| O      | -2.033515 | -1.241959 | -0.802561 |
| H      | -1.383509 | -2.845313 | 0.322304  |
| H      | -1.481028 | -1.274222 | 2.508887  |
| H      | -3.528376 | 0.245047  | 1.821267  |
| H      | -4.048001 | -0.784872 | -0.610770 |
| C      | -2.926607 | 1.005366  | -1.026398 |
| H      | -2.981517 | 0.858155  | -2.108738 |
| H      | -1.939979 | 1.418484  | -0.783962 |
| O      | -3.992827 | 1.881646  | -0.677496 |
| H      | -3.809570 | 2.235111  | 0.201894  |
| N      | 2.673752  | 1.530458  | 0.048249  |
| C      | 1.354190  | 1.803943  | 0.294006  |
| C      | 0.888676  | -0.368256 | 0.106714  |
| C      | 2.199140  | -0.760276 | -0.170355 |
| C      | 3.240042  | 0.235445  | -0.211724 |
| N      | 2.285390  | -2.125496 | -0.356127 |
| C      | 1.060948  | -2.546797 | -0.197931 |
| H      | 0.733287  | -3.575266 | -0.276207 |
| N      | 1.035259  | 3.116947  | 0.567097  |
| H      | 1.564593  | 3.829354  | 0.083580  |
| O      | 4.437503  | 0.137313  | -0.411156 |
| H      | 3.364840  | 2.269221  | 0.098709  |
| N      | 0.415204  | 0.888483  | 0.328838  |
| H      | 0.038863  | 3.284082  | 0.573522  |
| N      | 0.153065  | -1.536926 | 0.098251  |

| d4G 18 | X         | Y         | Z         |
|--------|-----------|-----------|-----------|
| C      | -1.258316 | 0.845670  | -0.656801 |
| C      | -2.159079 | 0.607071  | -1.842901 |
| C      | -3.414081 | 0.454036  | -1.429607 |
| C      | -3.481555 | 0.583652  | 0.069116  |
| O      | -2.123070 | 0.805367  | 0.474576  |
| H      | -0.740553 | 1.811968  | -0.686650 |
| H      | -1.787492 | 0.572914  | -2.859920 |
| H      | -4.282772 | 0.270757  | -2.051625 |
| H      | -4.070530 | 1.474016  | 0.353750  |
| C      | -4.087691 | -0.632557 | 0.779463  |
| H      | -3.453518 | -1.505215 | 0.598904  |
| H      | -5.076685 | -0.836460 | 0.333499  |
| O      | -4.162382 | -0.483181 | 2.182843  |
| H      | -4.738711 | 0.268134  | 2.376786  |
| N      | 3.641695  | 0.143765  | 0.387614  |
| C      | 2.923639  | 1.307829  | 0.297949  |
| C      | 1.117674  | 0.116582  | -0.212506 |
| C      | 1.743002  | -1.127706 | -0.163019 |
| C      | 3.143951  | -1.189607 | 0.166067  |
| N      | 0.847249  | -2.140751 | -0.449000 |
| C      | -0.284312 | -1.524497 | -0.666450 |
| H      | -1.219831 | -2.001104 | -0.922085 |
| N      | 3.586734  | 2.475059  | 0.604340  |
| H      | 4.565241  | 2.532674  | 0.359395  |
| O      | 3.904472  | -2.134050 | 0.281663  |
| H      | 4.605260  | 0.164392  | 0.698720  |
| N      | 1.650140  | 1.350380  | -0.014267 |
| H      | 3.052483  | 3.300911  | 0.372450  |
| N      | -0.192166 | -0.142869 | -0.547794 |

| d4G 19 | X         | Y         | Z         |
|--------|-----------|-----------|-----------|
| C      | 1.272538  | 0.940392  | -0.742273 |
| C      | 1.510589  | 1.863407  | 0.428801  |
| C      | 2.769205  | 1.735978  | 0.840041  |
| C      | 3.478294  | 0.701324  | 0.007385  |
| O      | 2.524370  | 0.352095  | -1.013818 |
| H      | 0.909882  | 1.465106  | -1.635252 |
| H      | 0.728884  | 2.491781  | 0.834895  |
| H      | 3.235378  | 2.251994  | 1.671536  |
| H      | 4.360374  | 1.113615  | -0.508426 |
| C      | 3.906474  | -0.533259 | 0.815712  |
| H      | 3.048788  | -0.910521 | 1.379719  |
| H      | 4.674747  | -0.220758 | 1.543289  |
| O      | 4.343355  | -1.607323 | 0.006774  |
| H      | 5.070225  | -1.299059 | -0.551127 |
| N      | -3.606991 | -0.034836 | 0.202004  |
| C      | -2.977676 | 1.163287  | -0.012651 |
| C      | -1.052667 | 0.070148  | -0.229854 |
| C      | -1.577846 | -1.204462 | -0.013768 |
| C      | -2.991042 | -1.338015 | 0.229912  |
| N      | -0.588593 | -2.162241 | -0.094855 |
| C      | 0.505681  | -1.487575 | -0.350929 |
| H      | 1.492152  | -1.900969 | -0.501019 |
| N      | -3.775370 | 2.287140  | -0.053314 |
| H      | -4.576128 | 2.306801  | 0.562960  |
| O      | -3.687962 | -2.316627 | 0.431336  |
| H      | -4.615166 | -0.068528 | 0.292176  |
| N      | -1.687530 | 1.276082  | -0.223312 |
| H      | -3.239955 | 3.144267  | -0.056030 |
| N      | 0.288686  | -0.118465 | -0.439282 |

| d4G 20 | X         | Y         | Z         |
|--------|-----------|-----------|-----------|
| C      | -1.423641 | -1.623843 | 0.360125  |
| C      | -1.873744 | -1.038804 | 1.675182  |
| C      | -2.849317 | -0.163033 | 1.460569  |
| C      | -3.120444 | -0.044462 | -0.015362 |
| O      | -2.198531 | -0.962621 | -0.626849 |
| H      | -1.615168 | -2.706431 | 0.308887  |
| H      | -1.442112 | -1.334698 | 2.623392  |
| H      | -3.380434 | 0.411218  | 2.210834  |
| H      | -4.143112 | -0.384455 | -0.258158 |
| C      | -2.934202 | 1.374276  | -0.563755 |
| H      | -1.888058 | 1.656357  | -0.424319 |
| H      | -3.563471 | 2.059118  | 0.031805  |
| O      | -3.205140 | 1.484493  | -1.948421 |
| H      | -4.125378 | 1.228796  | -2.097147 |
| N      | 2.733610  | 1.380681  | 0.080951  |
| C      | 1.454261  | 1.724911  | 0.429619  |
| C      | 0.825152  | -0.392370 | 0.132410  |
| C      | 2.084392  | -0.852109 | -0.255542 |
| C      | 3.189328  | 0.071891  | -0.299140 |
| N      | 2.058996  | -2.203603 | -0.537191 |
| C      | 0.818622  | -2.549896 | -0.328585 |
| H      | 0.412592  | -3.545070 | -0.455006 |
| N      | 1.246159  | 3.034450  | 0.806958  |
| H      | 1.786953  | 3.741009  | 0.327286  |
| O      | 4.362888  | -0.092586 | -0.581183 |
| H      | 3.476952  | 2.066633  | 0.133171  |
| N      | 0.456926  | 0.873757  | 0.467716  |
| H      | 0.265401  | 3.262961  | 0.892615  |
| N      | 0.007116  | -1.503728 | 0.093730  |
